# Supplementary material
Source: MDPI journal article supplement (https://www.mdpi.com/2077-0472/12/11/1803)
Supplement: s1 [file s1]

2007

|              |   | <i>Date</i> | <i>1</i> | <i>2</i> | <i>3</i> | <i>4</i> | <i>5</i> | <i>6</i> | <i>7</i> | <i>8</i> | <i>9</i> | <i>10</i> | <i>11</i> | <i>12</i> | <i>13</i> | <i>14</i> | <i>15</i> | <i>16</i> | <i>17</i> | <i>18</i> | <i>19</i> | <i>20</i> | <i>Av</i> |
|--------------|---|-------------|----------|----------|----------|----------|----------|----------|----------|----------|----------|-----------|-----------|-----------|-----------|-----------|-----------|-----------|-----------|-----------|-----------|-----------|-----------|
| Firmness [N] | 1 | 28.08.      | 70       | 68       | 72       | 81       | 78       | 83       | 89       | 84       | 72       | 75        | 78        | 85        | 72        | 71        | 78        | 82        | 76        | 76        | 89        | 83        | 78.1      |
|              | 2 | 01.09.      | 78       | 72       | 66       | 69       | 78       | 72       | 66       | 78       | 80       | 73        | 67        | 62        | 67        | 61        | 78        | 72        | 66        | 69        | 73        | 71        | 70.9      |
|              | 3 | 05.09.      | 67       | 62       | 71       | 65       | 60       | 66       | 72       | 71       | 79       | 68        | 66        | 60        | 67        | 62        | 71        | 65        | 60        | 66        | 72        | 77        | 67.4      |
|              | 4 | 10.09.      | 64       | 67       | 59       | 58       | 64       | 59       | 62       | 64       | 60       | 68        | 69        | 71        | 73        | 67        | 65        | 61        | 72        | 64        | 56        | 79        | 65.1      |
|              | 5 | 15.09.      | 62       | 65       | 73       | 67       | 65       | 61       | 72       | 64       | 56       | 79        | 62        | 65        | 73        | 67        | 65        | 61        | 72        | 64        | 56        | 69        | 65.9      |
|              | 6 | 19.09.      | 65       | 58       | 62       | 58       | 59       | 60       | 56       | 58       | 58       | 62        | 65        | 58        | 62        | 58        | 59        | 60        | 62        | 58        | 58        | 62        | 59.9      |
|              | 7 | 24.09.      | 48       | 51       | 53       | 48       | 45       | 47       | 48       | 53       | 48       | 51        | 50        | 48        | 48        | 51        | 50        | 48        | 48        | 51        | 50        | 48        | 49.2      |
|              | 8 | 29.09.      | 48       | 51       | 50       | 48       | 45       | 48       | 51       | 48       | 45       | 48        | 51        | 53        | 48        | 45        | 48        | 45        | 48        | 51        | 46        | 51        | 48.4      |

|              |   | <i>Date</i> | <i>1</i> | <i>2</i> | <i>3</i> | <i>4</i> | <i>5</i> | <i>6</i> | <i>7</i> | <i>8</i> | <i>9</i> | <i>10</i> | <i>11</i> | <i>12</i> | <i>13</i> | <i>14</i> | <i>15</i> | <i>16</i> | <i>17</i> | <i>18</i> | <i>19</i> | <i>20</i> | <i>Av</i> |
|--------------|---|-------------|----------|----------|----------|----------|----------|----------|----------|----------|----------|-----------|-----------|-----------|-----------|-----------|-----------|-----------|-----------|-----------|-----------|-----------|-----------|
| Firmness [N] | 5 | 22.03.      | 58       | 55       | 56       | 58       | 55       | 54       | 54       | 58       | 56       | 54        | 52        | 52        | 57        | 54        | 54        | 59        | 55        | 58        | 54        | 54        | 55.4      |
|              | 6 | 26.03.      | 55       | 51       | 48       | 46       | 45       | 42       | 52       | 51       | 44       | 41        | 51        | 48        | 49        | 42        | 48        | 49        | 48        | 51        | 48        | 45        | 47.7      |
|              | 7 | 31.03.      | 37       | 40       | 42       | 37       | 34       | 37       | 34       | 37       | 33       | 28        | 31        | 37        | 28        | 42        | 37        | 34        | 36        | 37        | 27        | 37        | 35.3      |
|              | 8 | 05.04.      | 32       | 34       | 31       | 36       | 28       | 35       | 28       | 29       | 32       | 34        | 32        | 21        | 28        | 33        | 35        | 36        | 34        | 33        | 32        | 35        | 31.9      |

2008

|              |   | <i>Date</i> | <i>1</i> | <i>2</i> | <i>3</i> | <i>4</i> | <i>5</i> | <i>6</i> | <i>7</i> | <i>8</i> | <i>9</i> | <i>10</i> | <i>11</i> | <i>12</i> | <i>13</i> | <i>14</i> | <i>15</i> | <i>16</i> | <i>17</i> | <i>18</i> | <i>19</i> | <i>20</i> | <i>Av</i> |
|--------------|---|-------------|----------|----------|----------|----------|----------|----------|----------|----------|----------|-----------|-----------|-----------|-----------|-----------|-----------|-----------|-----------|-----------|-----------|-----------|-----------|
| Firmness [N] | 1 | -           |          |          |          |          |          |          |          |          |          |           |           |           |           |           |           |           |           |           |           |           | -         |
|              | 2 | 15.08.      | 83       | 75       | 76       | 81       | 82       | 78       | 77       | 75       | 69       | 82        | 81        | 87        | 81        | 78        | 76        | 79        | 80        | 78        | 79        | 75        | 78.6      |
|              | 3 | 20.08.      | 77       | 74       | 78       | 69       | 75       | 80       | 67       | 86       | 83       | 79        | 75        | 80        | 67        | 86        | 82        | 78        | 77        | 75        | 69        | 82        | 77.0      |
|              | 4 | 25.08.      | 83       | 67       | 69       | 74       | 69       | 74       | 79       | 69       | 89       | 72        | 75        | 81        | 75        | 71        | 69        | 72        | 75        | 73        | 74        | 70        | 74.0      |
|              | 5 | 29.08.      | 74       | 74       | 71       | 77       | 76       | 71       | 74       | 68       | 72       | 68        | 74        | 73        | 68        | 76        | 75        | 77        | 68        | 75        | 68        | 69        | 72.4      |
|              | 6 | 03.09.      | 65       | 68       | 66       | 70       | 68       | 64       | 75       | 67       | 59       | 62        | 65        | 69        | 68        | 67        | 65        | 66        | 64        | 61        | 60        | 62        | 65.6      |
|              | 7 | 08.09.      | 57       | 65       | 62       | 61       | 67       | 62       | 65       | 67       | 63       | 59        | 57        | 65        | 62        | 61        | 67        | 62        | 65        | 67        | 63        | 59        | 62.8      |
|              | 8 | 13.09.      | 62       | 61       | 67       | 62       | 65       | 67       | 63       | 59       | 57       | 60        | 58        | 59        | 62        | 60        | 60        | 57        | 55        | 58        | 59        | 57        | 60.4      |

|              |   | <i>Date</i> | <i>1</i> | <i>2</i> | <i>3</i> | <i>4</i> | <i>5</i> | <i>6</i> | <i>7</i> | <i>8</i> | <i>9</i> | <i>10</i> | <i>11</i> | <i>12</i> | <i>13</i> | <i>14</i> | <i>15</i> | <i>16</i> | <i>17</i> | <i>18</i> | <i>19</i> | <i>20</i> | <i>Av</i> |
|--------------|---|-------------|----------|----------|----------|----------|----------|----------|----------|----------|----------|-----------|-----------|-----------|-----------|-----------|-----------|-----------|-----------|-----------|-----------|-----------|-----------|
| Firmness [N] | 5 | 16.03.      | 59       | 57       | 60       | 58       | 56       | 56       | 58       | 60       | 62       | 59        | 56        | 59        | 59        | 57        | 61        | 57        | 51        | 58        | 60        | 61        | 58.2      |
|              | 6 | 21.03.      | 54       | 53       | 60       | 50       | 53       | 55       | 52       | 56       | 58       | 59        | 53        | 56        | 54        | 58        | 55        | 51        | 64        | 53        | 54        | 55        | 55.2      |
|              | 7 | 26.03.      | 50       | 49       | 46       | 50       | 44       | 46       | 45       | 47       | 45       | 48        | 46        | 47        | 52        | 50        | 47        | 47        | 45        | 48        | 49        | 47        | 47.4      |

|   |   |        |    |    |    |    |    |    |    |    |    |    |    |    |    |    |    |    |    |    |    |    |      |
|---|---|--------|----|----|----|----|----|----|----|----|----|----|----|----|----|----|----|----|----|----|----|----|------|
| F | 8 | 31.03. | 39 | 44 | 32 | 34 | 38 | 40 | 41 | 39 | 38 | 38 | 40 | 41 | 45 | 36 | 36 | 43 | 44 | 40 | 40 | 40 | 39.4 |
|---|---|--------|----|----|----|----|----|----|----|----|----|----|----|----|----|----|----|----|----|----|----|----|------|

2009

|              |   |             |          |          |          |          |          |          |          |          |          |           |           |           |           |           |           |           |           |           |           |           |           |
|--------------|---|-------------|----------|----------|----------|----------|----------|----------|----------|----------|----------|-----------|-----------|-----------|-----------|-----------|-----------|-----------|-----------|-----------|-----------|-----------|-----------|
| Firmness [N] |   | <i>Date</i> | <i>1</i> | <i>2</i> | <i>3</i> | <i>4</i> | <i>5</i> | <i>6</i> | <i>7</i> | <i>8</i> | <i>9</i> | <i>10</i> | <i>11</i> | <i>12</i> | <i>13</i> | <i>14</i> | <i>15</i> | <i>16</i> | <i>17</i> | <i>18</i> | <i>19</i> | <i>20</i> | <i>Av</i> |
|              | 1 | 15.08.      | 83       | 80       | 85       | 91       | 86       | 74       | 77       | 80       | 87       | 83        | 80        | 85        | 91        | 86        | 74        | 77        | 80        | 87        | 70        | 74        | 81.5      |
|              | 2 | 20.08.      | 72       | 70       | 78       | 80       | 82       | 75       | 70       | 66       | 85       | 82        | 78        | 74        | 79        | 66        | 67        | 62        | 68        | 74        | 73        | 81        | 74.1      |
|              | 3 | 24.08.      | 67       | 62       | 68       | 74       | 73       | 81       | 86       | 78       | 68       | 88        | 71        | 74        | 80        | 74        | 70        | 80        | 82        | 75        | 78        | 78        | 75.4      |
|              | 4 | 28.08.      | 78       | 81       | 81       | 74       | 71       | 71       | 73       | 77       | 78       | 78        | 75        | 73        | 74        | 71        | 71        | 73        | 77        | 78        | 78        | 64        | 74.8      |
|              | 5 | 02.09.      | 74       | 66       | 58       | 65       | 68       | 69       | 62       | 75       | 69       | 75        | 69        | 62        | 69        | 71        | 71        | 60        | 65        | 68        | 69        | 62        | 67.4      |
|              | 6 | 07.09.      | 58       | 60       | 60       | 62       | 66       | 67       | 60       | 64       | 60       | 64        | 60        | 60        | 67        | 71        | 71        | 58        | 62        | 66        | 67        | 60        | 63.2      |
|              | 7 | 12.09.      | 50       | 55       | 50       | 53       | 59       | 64       | 51       | 50       | 53       | 50        | 53        | 61        | 59        | 53        | 66        | 58        | 53        | 59        | 64        | 51        | 55.6      |
|              | 8 | 16.09.      | 53       | 50       | 47       | 63       | 64       | 60       | 59       | 50       | 47       | 50        | 47        | 62        | 60        | 61        | 57        | 58        | 63        | 64        | 60        | 59        | 56.7      |

|              |   |             |          |          |          |          |          |          |          |          |          |           |           |           |           |           |           |           |           |           |           |           |           |
|--------------|---|-------------|----------|----------|----------|----------|----------|----------|----------|----------|----------|-----------|-----------|-----------|-----------|-----------|-----------|-----------|-----------|-----------|-----------|-----------|-----------|
| Firmness [N] |   | <i>Date</i> | <i>1</i> | <i>2</i> | <i>3</i> | <i>4</i> | <i>5</i> | <i>6</i> | <i>7</i> | <i>8</i> | <i>9</i> | <i>10</i> | <i>11</i> | <i>12</i> | <i>13</i> | <i>14</i> | <i>15</i> | <i>16</i> | <i>17</i> | <i>18</i> | <i>19</i> | <i>20</i> | <i>Av</i> |
|              | 5 | 12.03.      | 61       | 54       | 58       | 54       | 55       | 56       | 59       | 54       | 54       | 58        | 61        | 54        | 58        | 54        | 55        | 56        | 58        | 54        | 54        | 58        | 56.3      |
|              | 6 | 17.03.      | 54       | 60       | 56       | 58       | 55       | 53       | 60       | 54       | 53       | 52        | 52        | 53        | 50        | 51        | 50        | 51        | 54        | 53        | 56        | 57        | 54.1      |
|              | 7 | 22.03.      | 45       | 49       | 48       | 43       | 42       | 50       | 46       | 52       | 54       | 56        | 46        | 43        | 47        | 49        | 44        | 42        | 42        | 41        | 46        | 48        | 46.7      |
|              | 8 | 26.03.      | 39       | 40       | 44       | 43       | 40       | 37       | 38       | 37       | 38       | 40        | 40        | 39        | 39        | 40        | 44        | 43        | 40        | 37        | 38        | 37        | 39.7      |

2010

|              |   |             |          |          |          |          |          |          |          |          |          |           |           |           |           |           |           |           |           |           |           |           |           |
|--------------|---|-------------|----------|----------|----------|----------|----------|----------|----------|----------|----------|-----------|-----------|-----------|-----------|-----------|-----------|-----------|-----------|-----------|-----------|-----------|-----------|
| Firmness [N] |   | <i>Date</i> | <i>1</i> | <i>2</i> | <i>3</i> | <i>4</i> | <i>5</i> | <i>6</i> | <i>7</i> | <i>8</i> | <i>9</i> | <i>10</i> | <i>11</i> | <i>12</i> | <i>13</i> | <i>14</i> | <i>15</i> | <i>16</i> | <i>17</i> | <i>18</i> | <i>19</i> | <i>20</i> | <i>Av</i> |
|              | 1 | 16.08.      | 81       | 82       | 83       | 80       | 86       | 83       | 84       | 83       | 86       | 78        | 81        | 82        | 83        | 80        | 86        | 83        | 84        | 83        | 86        | 78        | 82.6      |
|              | 2 | 21.08.      | 74       | 71       | 71       | 73       | 77       | 78       | 71       | 78       | 81       | 81        | 74        | 71        | 71        | 73        | 77        | 78        | 71        | 78        | 81        | 81        | 75.5      |
|              | 3 | 25.08.      | 71       | 72       | 73       | 70       | 76       | 73       | 74       | 73       | 76       | 68        | 71        | 72        | 73        | 70        | 76        | 73        | 74        | 73        | 76        | 68        | 72.6      |
|              | 4 | 30.08.      | 64       | 61       | 61       | 63       | 67       | 68       | 61       | 68       | 71       | 71        | 64        | 61        | 61        | 63        | 67        | 68        | 61        | 68        | 71        | 71        | 65.5      |
|              | 5 | 03.09.      | 65       | 63       | 63       | 65       | 68       | 69       | 62       | 69       | 72       | 72        | 67        | 64        | 64        | 66        | 70        | 69        | 62        | 69        | 71        | 71        | 67.1      |
|              | 6 | 07.09.      | 63       | 60       | 60       | 62       | 66       | 67       | 60       | 67       | 70       | 70        | 62        | 59        | 59        | 61        | 66        | 67        | 60        | 67        | 71        | 71        | 64.4      |
|              | 7 | 11.09.      | 61       | 58       | 52       | 53       | 59       | 64       | 51       | 51       | 67       | 63        | 59        | 64        | 51        | 54        | 66        | 62        | 61        | 59        | 53        | 56        | 58.2      |
|              | 8 | 16.09.      | 49       | 57       | 58       | 63       | 56       | 60       | 59       | 57       | 51       | 55        | 63        | 55        | 63        | 60        | 58        | 61        | 62        | 60        | 61        | 57        | 58.3      |

|          |   |             |          |          |          |          |          |          |          |          |          |           |           |           |           |           |           |           |           |           |           |           |           |
|----------|---|-------------|----------|----------|----------|----------|----------|----------|----------|----------|----------|-----------|-----------|-----------|-----------|-----------|-----------|-----------|-----------|-----------|-----------|-----------|-----------|
| ness [N] |   | <i>Date</i> | <i>1</i> | <i>2</i> | <i>3</i> | <i>4</i> | <i>5</i> | <i>6</i> | <i>7</i> | <i>8</i> | <i>9</i> | <i>10</i> | <i>11</i> | <i>12</i> | <i>13</i> | <i>14</i> | <i>15</i> | <i>16</i> | <i>17</i> | <i>18</i> | <i>19</i> | <i>20</i> | <i>Av</i> |
|          | 5 | 07.03.      | 56       | 59       | 47       | 61       | 59       | 55       | 66       | 58       | 50       | 43        | 44        | 59        | 67        | 61        | 59        | 48        | 64        | 56        | 48        | 61        | 56.1      |
|          | 6 | 11.03.      | 52       | 54       | 54       | 59       | 28       | 55       | 56       | 57       | 42       | 50        | 54        | 55        | 54        | 53        | 50        | 47        | 48        | 47        | 44        | 44        | 50.2      |

|      |   |        |    |    |    |    |    |    |    |    |    |    |    |    |    |    |    |    |    |    |    |    |      |
|------|---|--------|----|----|----|----|----|----|----|----|----|----|----|----|----|----|----|----|----|----|----|----|------|
| Firm | 7 | 14.03. | 42 | 45 | 37 | 36 | 42 | 37 | 40 | 42 | 38 | 46 | 47 | 49 | 51 | 45 | 43 | 37 | 48 | 40 | 32 | 55 | 42.6 |
|      | 8 | 19.03. | 36 | 41 | 29 | 31 | 35 | 37 | 40 | 38 | 37 | 37 | 39 | 40 | 38 | 29 | 39 | 34 | 35 | 31 | 31 | 31 | 35.4 |

|      |              |   |             |          |          |          |          |          |          |          |          |          |           |           |           |           |           |           |           |           |           |           |           |           |
|------|--------------|---|-------------|----------|----------|----------|----------|----------|----------|----------|----------|----------|-----------|-----------|-----------|-----------|-----------|-----------|-----------|-----------|-----------|-----------|-----------|-----------|
| 2011 | Firmness [N] |   | <i>Date</i> | <i>1</i> | <i>2</i> | <i>3</i> | <i>4</i> | <i>5</i> | <i>6</i> | <i>7</i> | <i>8</i> | <i>9</i> | <i>10</i> | <i>11</i> | <i>12</i> | <i>13</i> | <i>14</i> | <i>15</i> | <i>16</i> | <i>17</i> | <i>18</i> | <i>19</i> | <i>20</i> | <i>Av</i> |
|      |              | 1 | 25.08.      | 85       | 90       | 87       | 91       | 83       | 87       | 90       | 85       | 81       | 79        | 83        | 84        | 87        | 85        | 87        | 82        | 78        | 79        | 81        | 87        | 84.6      |
|      |              | 2 | 30.08.      | 81       | 84       | 83       | 82       | 79       | 85       | 85       | 85       | 79       | 81        | 75        | 80        | 78        | 81        | 80        | 81        | 79        | 78        | 82        | 85        | 81.2      |
|      |              | 3 | 03.09.      | 82       | 78       | 74       | 82       | 84       | 84       | 90       | 85       | 78       | 77        | 85        | 88        | 84        | 81        | 79        | 83        | 87        | 79        | 80        | 83        | 82.2      |
|      |              | 4 | 08.09.      | 74       | 70       | 78       | 74       | 74       | 78       | 70       | 70       | 71       | 72        | 74        | 75        | 79        | 75        | 77        | 70        | 69        | 77        | 74        | 70        | 73.6      |
|      |              | 5 | 12.09.      | 72       | 68       | 69       | 65       | 70       | 77       | 74       | 73       | 73       | 73        | 70        | 77        | 74        | 78        | 74        | 70        | 70        | 71        | 69        | 74        | 72.1      |
|      |              | 6 | 17.09.      | 69       | 77       | 69       | 70       | 70       | 74       | 74       | 68       | 68       | 67        | 69        | 70        | 71        | 71        | 69        | 67        | 67        | 68        | 69        | 77        | 70.2      |
|      |              | 7 | 21.09.      | 67       | 68       | 71       | 69       | 71       | 64       | 62       | 61       | 73       | 68        | 76        | 74        | 64        | 68        | 66        | 65        | 71        | 67        | 76        | 74        | 68.8      |
|      |              | 8 | 26.09.      | 63       | 64       | 68       | 67       | 64       | 61       | 62       | 61       | 62       | 64        | 64        | 63        | 63        | 64        | 68        | 67        | 64        | 61        | 62        | 61        | 63.7      |

|              |   |             |          |          |          |          |          |          |          |          |          |           |           |           |           |           |           |           |           |           |           |           |           |
|--------------|---|-------------|----------|----------|----------|----------|----------|----------|----------|----------|----------|-----------|-----------|-----------|-----------|-----------|-----------|-----------|-----------|-----------|-----------|-----------|-----------|
| Firmness [N] |   | <i>Date</i> | <i>1</i> | <i>2</i> | <i>3</i> | <i>4</i> | <i>5</i> | <i>6</i> | <i>7</i> | <i>8</i> | <i>9</i> | <i>10</i> | <i>11</i> | <i>12</i> | <i>13</i> | <i>14</i> | <i>15</i> | <i>16</i> | <i>17</i> | <i>18</i> | <i>19</i> | <i>20</i> | <i>Av</i> |
|              | 5 | 20.03.      | 58       | 57       | 52       | 53       | 55       | 55       | 55       | 52       | 56       | 58        | 61        | 62        | 65        | 61        | 67        | 59        | 59        | 61        | 62        | 63        | 58.6      |
|              | 6 | 25.03.      | 48       | 56       | 53       | 52       | 58       | 56       | 59       | 61       | 57       | 53        | 51        | 59        | 56        | 55        | 61        | 54        | 57        | 59        | 55        | 51        | 55.6      |
|              | 7 | 29.03.      | 51       | 49       | 55       | 50       | 53       | 58       | 54       | 50       | 48       | 51        | 49        | 50        | 53        | 51        | 51        | 46        | 44        | 47        | 48        | 46        | 50.2      |
|              | 8 | 03.04.      | 37       | 45       | 46       | 36       | 37       | 51       | 50       | 48       | 42       | 40        | 54        | 39        | 54        | 51        | 49        | 50        | 38        | 49        | 50        | 46        | 45.6      |

|      |              |   |             |          |          |          |          |          |          |          |          |          |           |           |           |           |           |           |           |           |           |           |           |           |
|------|--------------|---|-------------|----------|----------|----------|----------|----------|----------|----------|----------|----------|-----------|-----------|-----------|-----------|-----------|-----------|-----------|-----------|-----------|-----------|-----------|-----------|
| 2012 | Firmness [N] |   | <i>Date</i> | <i>1</i> | <i>2</i> | <i>3</i> | <i>4</i> | <i>5</i> | <i>6</i> | <i>7</i> | <i>8</i> | <i>9</i> | <i>10</i> | <i>11</i> | <i>12</i> | <i>13</i> | <i>14</i> | <i>15</i> | <i>16</i> | <i>17</i> | <i>18</i> | <i>19</i> | <i>20</i> | <i>Av</i> |
|      |              | 1 | 24.08.      | 79       | 83       | 88       | 91       | 80       | 85       | 80       | 81       | 75       | 75        | 74        | 80        | 75        | 77        | 78        | 76        | 74        | 81        | 78        | 83        | 79.7      |
|      |              | 2 | 28.08.      | 79       | 79       | 76       | 82       | 81       | 76       | 79       | 73       | 77       | 73        | 79        | 78        | 73        | 81        | 80        | 82        | 73        | 80        | 73        | 74        | 77.4      |
|      |              | 3 | 01.09.      | 73       | 72       | 78       | 73       | 76       | 78       | 74       | 70       | 68       | 71        | 69        | 70        | 73        | 71        | 71        | 68        | 66        | 69        | 70        | 68        | 71.4      |
|      |              | 4 | 06.09.      | 68       | 69       | 70       | 67       | 73       | 70       | 71       | 70       | 73       | 65        | 68        | 69        | 70        | 67        | 73        | 70        | 71        | 70        | 73        | 75        | 70.1      |
|      |              | 5 | 11.09.      | 63       | 66       | 58       | 57       | 63       | 58       | 61       | 63       | 59       | 67        | 68        | 70        | 72        | 66        | 64        | 60        | 71        | 63        | 55        | 68        | 63.6      |
|      |              | 6 | 16.09.      | 63       | 68       | 67       | 65       | 64       | 61       | 64       | 66       | 65       | 61        | 58        | 67        | 61        | 64        | 57        | 67        | 67        | 62        | 60        | 60        | 63.4      |
|      |              | 7 | 20.09.      | 60       | 61       | 57       | 55       | 74       | 65       | 61       | 57       | 63       | 57        | 55        | 55        | 58        | 61        | 54        | 60        | 54        | 61        | 57        | 57        | 59.1      |
|      |              | 8 | 24.09.      | 57       | 59       | 59       | 64       | 33       | 60       | 61       | 62       | 54       | 55        | 59        | 60        | 59        | 58        | 55        | 54        | 55        | 54        | 51        | 51        | 56.0      |

|       |   |             |          |          |          |          |          |          |          |          |          |           |           |           |           |           |           |           |           |           |           |           |           |
|-------|---|-------------|----------|----------|----------|----------|----------|----------|----------|----------|----------|-----------|-----------|-----------|-----------|-----------|-----------|-----------|-----------|-----------|-----------|-----------|-----------|
| s [N] |   | <i>Date</i> | <i>1</i> | <i>2</i> | <i>3</i> | <i>4</i> | <i>5</i> | <i>6</i> | <i>7</i> | <i>8</i> | <i>9</i> | <i>10</i> | <i>11</i> | <i>12</i> | <i>13</i> | <i>14</i> | <i>15</i> | <i>16</i> | <i>17</i> | <i>18</i> | <i>19</i> | <i>20</i> | <i>Av</i> |
|       | 5 | 25.03.      | 52       | 46       | 47       | 44       | 49       | 53       | 49       | 50       | 56       | 55        | 54        | 56        | 55        | 51        | 54        | 55        | 55        | 51        | 51        | 52        | 51.8      |



|              |   |        |    |    |    |    |    |    |    |    |    |    |    |    |    |    |    |    |    |    |    |    |      |
|--------------|---|--------|----|----|----|----|----|----|----|----|----|----|----|----|----|----|----|----|----|----|----|----|------|
| Firmness [N] | 5 | 26.03. | 55 | 56 | 57 | 59 | 54 | 51 | 53 | 54 | 59 | 58 | 58 | 60 | 62 | 64 | 51 | 49 | 58 | 61 | 48 | 48 | 55.8 |
|              | 6 | 30.03. | 53 | 52 | 47 | 53 | 54 | 50 | 56 | 47 | 55 | 55 | 57 | 54 | 38 | 60 | 57 | 55 | 51 | 48 | 56 | 57 | 52.8 |
|              | 7 | 03.04. | 49 | 48 | 54 | 50 | 52 | 49 | 47 | 54 | 48 | 46 | 48 | 53 | 49 | 47 | 44 | 48 | 52 | 43 | 45 | 53 | 49.0 |
|              | 8 | 07.04. | 45 | 46 | 49 | 46 | 51 | 43 | 44 | 53 | 50 | 40 | 42 | 43 | 41 | 40 | 41 | 48 | 40 | 38 | 51 | 51 | 45.1 |

|      |              |   |             |          |          |          |          |          |          |          |          |          |           |           |           |           |           |           |           |           |           |           |           |           |
|------|--------------|---|-------------|----------|----------|----------|----------|----------|----------|----------|----------|----------|-----------|-----------|-----------|-----------|-----------|-----------|-----------|-----------|-----------|-----------|-----------|-----------|
| 2015 | Firmness [N] |   | <i>Date</i> | <i>1</i> | <i>2</i> | <i>3</i> | <i>4</i> | <i>5</i> | <i>6</i> | <i>7</i> | <i>8</i> | <i>9</i> | <i>10</i> | <i>11</i> | <i>12</i> | <i>13</i> | <i>14</i> | <i>15</i> | <i>16</i> | <i>17</i> | <i>18</i> | <i>19</i> | <i>20</i> | <i>Av</i> |
|      |              | 1 | 29.08.      | 81       | 84       | 83       | 77       | 75       | 74       | 80       | 78       | 80       | 84        | 84        | 77        | 78        | 88        | 79        | 81        | 83        | 75        | 80        | 83        | 80.2      |
|      |              | 2 | 02.09.      | 82       | 83       | 83       | 80       | 77       | 78       | 86       | 79       | 81       | 81        | 86        | 83        | 85        | 80        | 84        | 83        | 77        | 83        | 85        | 84        | 82.0      |
|      |              | 3 | 05.09.      | 78       | 83       | 84       | 82       | 81       | 83       | 73       | 74       | 70       | 71        | 80        | 81        | 77        | 80        | 79        | 78        | 73        | 84        | 74        | 75        | 78.0      |
|      |              | 4 | 09.09.      | 76       | 70       | 71       | 68       | 73       | 77       | 73       | 74       | 80       | 79        | 78        | 80        | 79        | 75        | 78        | 81        | 81        | 77        | 77        | 78        | 76.3      |
|      |              | 5 | 13.09.      | 68       | 64       | 66       | 63       | 64       | 70       | 69       | 65       | 63       | 68        | 66        | 71        | 70        | 68        | 67        | 65        | ##        | 67        | 66        | 64        | 68.4      |
|      |              | 6 | 17.09.      | 64       | 64       | 58       | 57       | 60       | 62       | 64       | 63       | 63       | 68        | 70        | 69        | 67        | 68        | 66        | 64        | 64        | 67        | 60        | 61        | 64.0      |
|      |              | 7 | 21.09.      | 60       | 59       | 54       | 55       | 57       | 54       | 54       | 51       | 55       | 57        | 60        | 61        | 64        | 60        | 66        | 60        | 60        | 62        | 63        | 64        | 58.8      |
|      |              | 8 | 26.09.      | 55       | 60       | 48       | 50       | 54       | 56       | 57       | 55       | 54       | 56        | 57        | 59        | 50        | 60        | 57        | 58        | 54        | 54        | 54        | 54        | 55.1      |

|              |   |             |          |          |          |          |          |          |          |          |          |           |           |           |           |           |           |           |           |           |           |           |           |
|--------------|---|-------------|----------|----------|----------|----------|----------|----------|----------|----------|----------|-----------|-----------|-----------|-----------|-----------|-----------|-----------|-----------|-----------|-----------|-----------|-----------|
| Firmness [N] |   | <i>Date</i> | <i>1</i> | <i>2</i> | <i>3</i> | <i>4</i> | <i>5</i> | <i>6</i> | <i>7</i> | <i>8</i> | <i>9</i> | <i>10</i> | <i>11</i> | <i>12</i> | <i>13</i> | <i>14</i> | <i>15</i> | <i>16</i> | <i>17</i> | <i>18</i> | <i>19</i> | <i>20</i> | <i>Av</i> |
|              | 5 | 15.03.      | 56       | 52       | 56       | 48       | 49       | 59       | 61       | 52       | 48       | 50        | 58        | 61        | 53        | 53        | 55        | 57        | 51        | 59        | 60        | 59        | 54.9      |
|              | 6 | 19.03.      | 58       | 55       | 57       | 55       | 58       | 55       | 53       | 52       | 59       | 60        | 52        | 51        | 50        | 51        | 48        | 48        | 48        | 51        | 52        | 55        | 53.4      |
|              | 7 | 23.03.      | 47       | 45       | 46       | 41       | 38       | 31       | 41       | 45       | 41       | 46        | 48        | 50        | 51        | 45        | 53        | 51        | 51        | 57        | 58        | 51        | 46.8      |
|              | 8 | 28.03.      | 41       | 42       | 36       | 35       | 46       | 45       | 47       | 51       | 51       | 36        | 42        | 45        | 37        | 36        | 33        | 37        | 48        | 51        | 42        | 40        | 42.1      |

|      |              |   |             |          |          |          |          |          |          |          |          |          |           |           |           |           |           |           |           |           |           |           |           |           |
|------|--------------|---|-------------|----------|----------|----------|----------|----------|----------|----------|----------|----------|-----------|-----------|-----------|-----------|-----------|-----------|-----------|-----------|-----------|-----------|-----------|-----------|
| 2016 | Firmness [N] |   | <i>Date</i> | <i>1</i> | <i>2</i> | <i>3</i> | <i>4</i> | <i>5</i> | <i>6</i> | <i>7</i> | <i>8</i> | <i>9</i> | <i>10</i> | <i>11</i> | <i>12</i> | <i>13</i> | <i>14</i> | <i>15</i> | <i>16</i> | <i>17</i> | <i>18</i> | <i>19</i> | <i>20</i> | <i>Av</i> |
|      |              | 1 | -           |          |          |          |          |          |          |          |          |          |           |           |           |           |           |           |           |           |           |           |           | -         |
|      |              | 2 | 24.08.      | 77       | 74       | 74       | 76       | 80       | 81       | 74       | 81       | 84       | 84        | 77        | 74        | 74        | 76        | 80        | 81        | 74        | 81        | 84        | 84        | 78.5      |
|      |              | 3 | 27.08.      | 73       | 74       | 75       | 72       | 78       | 75       | 76       | 75       | 78       | 70        | 73        | 74        | 75        | 72        | 78        | 75        | 76        | 75        | 78        | 70        | 74.6      |
|      |              | 4 | 31.09.      | 65       | 62       | 62       | 64       | 68       | 69       | 62       | 69       | 72       | 72        | 65        | 62        | 62        | 64        | 68        | 69        | 62        | 69        | 72        | 72        | 66.5      |
|      |              | 5 | 07.09.      | 65       | 63       | 63       | 65       | 68       | 69       | 62       | 69       | 72       | 72        | 67        | 64        | 64        | 66        | 70        | 69        | 62        | 69        | 71        | 71        | 67.1      |
|      |              | 6 | 12.09.      | 62       | 59       | 59       | 61       | 65       | 66       | 59       | 66       | 69       | 69        | 61        | 58        | 58        | 60        | 65        | 66        | 59        | 66        | 70        | 70        | 63.4      |
|      |              | 7 | 16.09.      | 61       | 58       | 62       | 53       | 59       | 64       | 51       | 70       | 67       | 63        | 59        | 64        | 51        | 70        | 66        | 62        | 61        | 59        | 53        | 66        | 61.0      |
|      |              | 8 | 20.09.      | 64       | 56       | 57       | 62       | 63       | 59       | 58       | 56       | 50       | 63        | 62        | 68        | 62        | 59        | 57        | 60        | 61        | 59        | 60        | 56        | 59.6      |

2017

| Firmness [N] |   | Date   | 1  | 2  | 3  | 4  | 5  | 6  | 7  | 8  | 9  | 10 | 11 | 12 | 13 | 14 | 15 | 16 | 17 | 18 | 19 | 20 | Av   |
|--------------|---|--------|----|----|----|----|----|----|----|----|----|----|----|----|----|----|----|----|----|----|----|----|------|
| 5            | 6 | 21.03. | 57 | 59 | 57 | 52 | 49 | 55 | 54 | 58 | 52 | 51 | 62 | 55 | 57 | 54 | 52 | 51 | 58 | 62 | 53 | 52 | 55.0 |
|              |   | 26.03. | 53 | 54 | 48 | 61 | 51 | 52 | 55 | 54 | 61 | 58 | 55 | 53 | 61 | 55 | 48 | 47 | 54 | 54 | 51 | 52 | 53.9 |
|              |   | 30.03. | 51 | 47 | 51 | 55 | 45 | 46 | 49 | 49 | 54 | 55 | 48 | 48 | 54 | 56 | 52 | 51 | 52 | 51 | 54 | 55 | 51.2 |
|              |   | 03.04. | 44 | 38 | 39 | 42 | 45 | 51 | 40 | 38 | 37 | 45 | 46 | 51 | 50 | 52 | 41 | 41 | 51 | 39 | 40 | 48 | 43.9 |

| Firmness [N] |   | Date   | 1  | 2  | 3  | 4  | 5  | 6  | 7  | 8  | 9  | 10 | 11 | 12 | 13 | 14 | 15 | 16 | 17 | 18 | 19 | 20 | Av   |
|--------------|---|--------|----|----|----|----|----|----|----|----|----|----|----|----|----|----|----|----|----|----|----|----|------|
| 1            | 2 | -      |    |    |    |    |    |    |    |    |    |    |    |    |    |    |    |    |    |    |    |    | -    |
|              |   | 01.09. | 85 | 77 | 78 | 83 | 84 | 80 | 79 | 77 | 71 | 84 | 83 | 89 | 83 | 80 | 78 | 81 | 82 | 80 | 81 | 77 | 80.6 |
|              |   | 05.09. | 78 | 75 | 79 | 70 | 76 | 81 | 68 | 87 | 84 | 80 | 76 | 81 | 68 | 87 | 83 | 79 | 78 | 76 | 70 | 83 | 78.0 |
|              |   | 09.09. | 83 | 67 | 69 | 74 | 69 | 74 | 79 | 69 | 89 | 72 | 75 | 81 | 75 | 71 | 69 | 72 | 75 | 73 | 74 | 70 | 74.0 |
|              |   | 13.09. | 73 | 73 | 70 | 76 | 75 | 70 | 73 | 67 | 71 | 67 | 73 | 72 | 67 | 75 | 74 | 76 | 67 | 74 | 67 | 68 | 71.4 |
|              |   | 18.09. | 67 | 70 | 68 | 72 | 70 | 66 | 77 | 69 | 61 | 64 | 67 | 71 | 70 | 69 | 67 | 68 | 66 | 63 | 62 | 64 | 67.6 |
|              |   | 22.09. | 58 | 66 | 63 | 62 | 68 | 63 | 66 | 68 | 64 | 60 | 58 | 66 | 63 | 62 | 68 | 63 | 66 | 68 | 64 | 60 | 63.8 |
|              |   | 26.09. | 63 | 62 | 68 | 63 | 66 | 68 | 64 | 60 | 58 | 61 | 59 | 60 | 63 | 61 | 61 | 58 | 56 | 59 | 60 | 58 | 61.4 |

| Firmness [N] |   | Date   | 1  | 2  | 3  | 4  | 5  | 6  | 7  | 8  | 9  | 10 | 11 | 12 | 13 | 14 | 15 | 16 | 17 | 18 | 19 | 20 | Av   |
|--------------|---|--------|----|----|----|----|----|----|----|----|----|----|----|----|----|----|----|----|----|----|----|----|------|
| 5            | 6 | 17.03. | 60 | 62 | 62 | 54 | 56 | 57 | 61 | 60 | 60 | 52 | 55 | 58 | 59 | 59 | 62 | 61 | 63 | 60 | 61 | 63 | 59.3 |
|              |   | 22.03. | 56 | 61 | 60 | 61 | 58 | 55 | 52 | 56 | 55 | 56 | 52 | 52 | 60 | 60 | 55 | 54 | 52 | 51 | 52 | 57 | 55.8 |
|              |   | 26.03. | 55 | 53 | 61 | 55 | 57 | 51 | 58 | 55 | 56 | 51 | 51 | 57 | 51 | 55 | 61 | 58 | 56 | 55 | 51 | 52 | 55.0 |
|              |   | 30.03. | 47 | 54 | 56 | 51 | 52 | 42 | 45 | 46 | 47 | 45 | 48 | 42 | 48 | 46 | 46 | 45 | 42 | 42 | 41 | 40 | 46.3 |

| 2007 | TSS (Total Soluble Solids) | 1 | 28.08. | 9.1  | 8.8  | 9.4  | 10.0 | 9.8  | 9.2  | 9.3  | 8.7  | 8.1  | 9.0  | 9.2  | 8.3  | 9.1  |
|------|----------------------------|---|--------|------|------|------|------|------|------|------|------|------|------|------|------|------|
|      |                            | 2 | 01.09. | 9.6  | 10.1 | 8.8  | 9.4  | 9.7  | 9.5  | 8.5  | 8.8  | 9.4  | 10.0 | 9.8  | 9.2  | 9.4  |
|      |                            | 3 | 05.09. | 9.8  | 9.2  | 9.4  | 9.8  | 10.0 | 10.7 | 9.8  | 9.4  | 9.1  | 9.5  | 9.6  | 10.2 | 9.7  |
|      |                            | 4 | 10.09. | 10.1 | 9.8  | 10.4 | 9.4  | 9.8  | 9.2  | 10.6 | 10.3 | 10.1 | 9.5  | 10.0 | 10.0 | 9.9  |
|      |                            | 5 | 15.09. | 10.4 | 10.8 | 11.1 | 12.2 | 10.4 | 10.5 | 10.8 | 11.0 | 11.2 | 10.3 | 10.5 | 10.6 | 10.8 |
|      |                            | 6 | 19.09. | 10.1 | 10.2 | 10.4 | 10.5 | 11.0 | 11.5 | 11.8 | 11.7 | 11.6 | 10.2 | 10.4 | 10.1 | 10.8 |
|      |                            | 7 | 24.09. | 11.6 | 12.0 | 10.3 | 9.8  | 10.2 | 11.7 | 10.2 | 11.1 | 11.2 | 11.8 | 12.3 | 12.0 | 11.2 |
|      |                            | 8 | 29.09. | 11.6 | 11.0 | 11.5 | 11.8 | 11.7 | 11.6 | 12.1 | 11.4 | 11.8 | 12.0 | 11.7 | 12.1 | 11.7 |

| TSS (after storage) |   | Date   | 1    | 2    | 3    | 4    | 5    | 6    | 7    | 8    | 9    | 10   | 11   | 12   | 13   |
|---------------------|---|--------|------|------|------|------|------|------|------|------|------|------|------|------|------|
|                     | 5 | 22.03. | 12.5 | 13.2 | 14.1 | 12.6 | 12.8 | 11.9 | 13.2 | 14.1 | 12.6 | 13.4 | 14.2 | 11.8 | 13.0 |
|                     | 6 | 26.03. | 13.1 | 13.5 | 12.2 | 12.2 | 11.8 | 11.8 | 12.4 | 12.5 | 12.7 | 12.1 | 12.8 | 13.2 | 12.5 |
|                     | 7 | 31.03. | 12.5 | 10.7 | 12.1 | 11.8 | 11.5 | 12.9 | 12.7 | 11.2 | 11.4 | 10.8 | 10.5 | 10.2 | 11.5 |
|                     | 8 | 05.04. | 10.5 | 11.0 | 9.9  | 13.2 | 12.2 | 10.5 | 11.4 | 11.2 | 10.4 | 10.8 | 10.1 | 10.0 | 10.9 |

|      |                            | Date | 1      | 2    | 3    | 4    | 5    | 6    | 7    | 8    | 9    | 10   | 11   | 12   | Av   |      |
|------|----------------------------|------|--------|------|------|------|------|------|------|------|------|------|------|------|------|------|
| 2008 | TSS (Total Soluble Solids) | 1    | -      |      |      |      |      |      |      |      |      |      |      |      | -    |      |
|      |                            | 2    | 15.08. | 10.9 | 9.8  | 9.9  | 10.2 | 9.5  | 9.0  | 8.6  | 10.2 | 8.9  | 8.7  | 9.4  | 9.5  | 9.6  |
|      |                            | 3    | 20.08. | 11.5 | 11.3 | 11.7 | 11.4 | 10.8 | 9.4  | 9.9  | 9.5  | 9.8  | 10.1 | 9.4  | 10.2 | 10.4 |
|      |                            | 4    | 25.08. | 11.2 | 10.4 | 11.5 | 9.8  | 10.1 | 10.6 | 9.8  | 9.7  | 9.5  | 9.7  | 10.0 | 10.0 | 10.2 |
|      |                            | 5    | 29.08. | 10.7 | 11.4 | 11.5 | 11.8 | 10.5 | 10.2 | 12.0 | 11.8 | 11.6 | 11.8 | 11.0 | 12.0 | 11.4 |
|      |                            | 6    | 03.09. | 12.0 | 11.9 | 10.6 | 10.4 | 11.2 | 11.4 | 11.6 | 10.9 | 11.6 | 11.6 | 11.8 | 13.0 | 11.5 |
|      |                            | 7    | 08.09. | 10.9 | 11.2 | 11.8 | 12.4 | 12.2 | 11.8 | 11.9 | 12.6 | 13.0 | 12.7 | 11.9 | 12.9 | 12.1 |
|      |                            | 8    | 13.09. | 12.6 | 12.1 | 12.5 | 12.7 | 13.2 | 13.0 | 15.0 | 12.4 | 12.5 | 13.4 | 13.2 | 13.1 | 13.0 |

| TSS (after storage) |   | Date   | 1    | 2    | 3    | 4    | 5    | 6    | 7    | 8    | 9    | 10   | 11   | 12   | 13   |
|---------------------|---|--------|------|------|------|------|------|------|------|------|------|------|------|------|------|
|                     | 5 | 22.03. | 12.5 | 12.6 | 11.5 | 10.7 | 10.5 | 12.5 | 12.8 | 13.4 | 13.5 | 12.6 | 11.7 | 11.1 | 12.1 |
|                     | 6 | 26.03. | 11.8 | 11.9 | 11.6 | 11.7 | 12.5 | 12.5 | 13.5 | 13.5 | 12.8 | 11.5 | 12.6 | 13.2 | 12.4 |
|                     | 7 | 31.03. | 11.5 | 11.2 | 10.5 | 12.2 | 12.4 | 11.0 | 10.6 | 12.2 | 11.4 | 11.8 | 10.1 | 11.5 | 11.4 |
|                     | 8 | 05.04. | 10.1 | 10.2 | 10.0 | 9.6  | 9.8  | 11.0 | 10.5 | 10.9 | 10.5 | 9.8  | 10.5 | 10.5 | 10.3 |

|      |                            | <i>Date</i> | <i>1</i> | <i>2</i> | <i>3</i> | <i>4</i> | <i>5</i> | <i>6</i> | <i>7</i> | <i>8</i> | <i>9</i> | <i>10</i> | <i>11</i> | <i>12</i> | <i>Av</i> |      |
|------|----------------------------|-------------|----------|----------|----------|----------|----------|----------|----------|----------|----------|-----------|-----------|-----------|-----------|------|
| 2009 | TSS (Total Soluble Solids) | 1           | 15.08.   | 10.0     | 9.8      | 8.9      | 8.6      | 8.4      | 9.9      | 10.1     | 9.8      | 8.9       | 8.7       | 8.8       | 9.6       | 9.3  |
|      |                            | 2           | 20.08.   | 9.8      | 11.5     | 10.0     | 9.5      | 9.5      | 11.0     | 10.0     | 11.0     | 11.0      | 11.0      | 10.4      | 9.2       | 10.3 |
|      |                            | 3           | 24.08.   | 9.8      | 10.8     | 10.4     | 10.1     | 9.8      | 10.8     | 10.4     | 10.1     | 9.7       | 9.9       | 11.0      | 10.8      | 10.3 |
|      |                            | 4           | 28.08.   | 10.5     | 11.6     | 11.4     | 10.6     | 12.6     | 10.0     | 11.4     | 11.6     | 9.8       | 10.8      | 10.4      | 10.1      | 10.9 |
|      |                            | 5           | 02.09.   | 12.2     | 13.0     | 10.5     | 11.2     | 11.0     | 12.0     | 11.4     | 10.0     | 11.0      | 13.0      | 11.4      | 11.6      | 11.5 |
|      |                            | 6           | 07.09.   | 12.0     | 11.9     | 10.6     | 10.4     | 11.2     | 11.4     | 11.6     | 10.9     | 11.6      | 11.6      | 11.5      | 11.7      | 11.4 |
|      |                            | 7           | 12.09.   | 12.5     | 12.8     | 13.6     | 12.3     | 12.0     | 13.2     | 13.0     | 12.9     | 12.7      | 13.5      | 11.6      | 11.8      | 12.7 |
|      |                            | 8           | 16.09.   | 12.9     | 14.0     | 13.5     | 13.5     | 13.7     | 13.1     | 14.8     | 15.5     | 14.6      | 12.8      | 12.6      | 12.2      | 13.6 |

|               |   | Date   | 1    | 2    | 3    | 4    | 5    | 6    | 7    | 8    | 9    | 10   | 11   | 12   | 13   |
|---------------|---|--------|------|------|------|------|------|------|------|------|------|------|------|------|------|
| after storage | 5 | 12.03. | 12.6 | 13.2 | 13.0 | 12.9 | 12.5 | 12.8 | 13.6 | 12.3 | 12.0 | 11.8 | 11.5 | 13.1 | 12.6 |
|               | 6 | 17.03. | 12.5 | 12.1 | 12.8 | 13.4 | 13.6 | 12.1 | 12.6 | 11.8 | 11.8 | 11.6 | 12.8 | 12.7 | 12.5 |

|         |   |        |      |      |      |      |      |      |      |      |      |      |      |      |      |
|---------|---|--------|------|------|------|------|------|------|------|------|------|------|------|------|------|
| TSS (€) | 7 | 22.03. | 11.1 | 11.8 | 12.4 | 11.2 | 11.2 | 11.4 | 12.8 | 12.4 | 12.5 | 10.8 | 11.9 | 11.2 | 11.7 |
|         | 8 | 26.03. | 10.8 | 11.1 | 10.5 | 12.1 | 12.3 | 11.5 | 11.9 | 10.5 | 10.8 | 11.1 | 12.8 | 12.1 | 11.5 |

|      |                            | Date | 1      | 2    | 3    | 4    | 5    | 6    | 7    | 8    | 9    | 10   | 11   | 12   | Av   |      |
|------|----------------------------|------|--------|------|------|------|------|------|------|------|------|------|------|------|------|------|
| 2010 | TSS (Total Soluble Solids) | 1    | 16.08. | 10.2 | 9.3  | 9.1  | 9.5  | 10.5 | 10.0 | 9.8  | 9.4  | 9.7  | 8.8  | 9.2  | 10.5 | 9.7  |
|      |                            | 2    | 21.08. | 9.6  | 10.4 | 10.0 | 9.8  | 9.2  | 8.8  | 9.1  | 10.2 | 10.5 | 9.2  | 10.5 | 11.0 | 9.9  |
|      |                            | 3    | 25.08. | 11.5 | 11.3 | 10.2 | 11.4 | 10.8 | 9.9  | 11.3 | 11.7 | 11.4 | 10.8 | 9.4  | 9.9  | 10.8 |
|      |                            | 4    | 30.08. | 11.2 | 10.4 | 11.5 | 9.8  | 10.1 | 9.3  | 10.4 | 11.5 | 9.8  | 10.1 | 10.6 | 11.5 | 10.5 |
|      |                            | 5    | 03.09. | 10.4 | 10.8 | 10.6 | 11.0 | 10.1 | 11.5 | 12.6 | 10.8 | 10.9 | 11.2 | 10.9 | 11.2 | 11.0 |
|      |                            | 6    | 07.09. | 11.6 | 10.5 | 10.6 | 10.7 | 11.5 | 10.8 | 10.9 | 11.4 | 11.9 | 12.2 | 11.9 | 12.2 | 11.4 |
|      |                            | 7    | 11.09. | 11.5 | 11.6 | 10.5 | 10.6 | 10.7 | 11.5 | 10.6 | 11.5 | 12.0 | 11.6 | 11.8 | 10.9 | 11.2 |
|      |                            | 8    | 16.09. | 10.8 | 11.8 | 11.0 | 12.6 | 12.2 | 13.1 | 12.2 | 12.5 | 13.2 | 11.1 | 11.6 | 12.0 | 12.0 |

|                     |   | Date   | 1    | 2    | 3    | 4    | 5    | 6    | 7    | 8    | 9    | 10   | 11   | 12   | 13   |
|---------------------|---|--------|------|------|------|------|------|------|------|------|------|------|------|------|------|
| TSS (after storage) | 5 | 12.03. | 13.1 | 13.0 | 12.5 | 12.4 | 13.8 | 13.4 | 13.9 | 14.2 | 12.4 | 12.6 | 12.8 | 12.4 | 13.0 |
|                     | 6 | 17.03. | 12.5 | 13.4 | 11.4 | 12.6 | 13.1 | 12.8 | 12.5 | 11.4 | 11.2 | 12.8 | 13.1 | 13.2 | 12.5 |
|                     | 7 | 22.03. | 11.8 | 11.2 | 11.0 | 10.8 | 12.5 | 12.3 | 11.5 | 11.8 | 12.6 | 12.4 | 11.3 | 12.2 | 11.8 |
|                     | 8 | 26.03. | 11.1 | 10.3 | 10.6 | 11.5 | 12.6 | 10.1 | 11.6 | 11.7 | 12.6 | 10.1 | 10.5 | 9.8  | 11.0 |

|      |                            | Date | 1      | 2    | 3    | 4    | 5    | 6    | 7    | 8    | 9    | 10   | 11   | 12   | Av   |      |
|------|----------------------------|------|--------|------|------|------|------|------|------|------|------|------|------|------|------|------|
| 2011 | TSS (Total Soluble Solids) | 1    | 25.08. | 9.9  | 10.1 | 10.6 | 10.4 | 9.9  | 9.2  | 9.4  | 9.9  | 9.4  | 9.5  | 10.0 | 9.2  | 9.8  |
|      |                            | 2    | 30.08. | 10.9 | 9.7  | 9.7  | 9.3  | 10.4 | 9.2  | 9.6  | 10.4 | 11.5 | 9.5  | 9.6  | 9.5  | 9.9  |
|      |                            | 3    | 03.09. | 9.6  | 9.7  | 10.0 | 9.9  | 10.7 | 10.8 | 10.4 | 10.4 | 12.0 | 9.9  | 10.8 | 10.9 | 10.4 |
|      |                            | 4    | 08.09. | 11.4 | 10.4 | 9.9  | 11.9 | 9.9  | 10.4 | 10.4 | 10.4 | 10.3 | 11.4 | 10.3 | 10.2 | 10.6 |
|      |                            | 5    | 12.09. | 11.4 | 12.4 | 11.4 | 11.0 | 11.4 | 11.4 | 10.9 | 9.9  | 11.4 | 11.0 | 11.1 | 10.9 | 11.2 |
|      |                            | 6    | 17.09. | 13.4 | 11.9 | 11.9 | 10.9 | 10.9 | 10.2 | 11.4 | 10.9 | 10.9 | 10.9 | 11.9 | 12.0 | 11.4 |
|      |                            | 7    | 21.09. | 12.4 | 11.9 | 11.3 | 11.3 | 12.9 | 11.8 | 11.0 | 13.4 | 13.4 | 11.8 | 11.9 | 12.5 | 12.1 |
|      |                            | 8    | 26.09. | 11.4 | 11.4 | 11.9 | 13.4 | 12.9 | 10.9 | 11.4 | 11.4 | 11.9 | 13.4 | 11.9 | 12.6 | 12.0 |

|                     |   | Date   | 1    | 2    | 3    | 4    | 5    | 6    | 7    | 8    | 9    | 10   | 11   | 12   | 13   |
|---------------------|---|--------|------|------|------|------|------|------|------|------|------|------|------|------|------|
| TSS (after storage) | 5 | 20.03. | 12.5 | 11.4 | 11.8 | 12.5 | 12.6 | 11.3 | 13.5 | 13.0 | 12.5 | 12.8 | 13.0 | 13.6 | 12.5 |
|                     | 6 | 25.03. | 12.7 | 13.4 | 13.1 | 12.5 | 12.5 | 13.2 | 11.8 | 11.8 | 11.5 | 12.8 | 13.1 | 13.8 | 12.7 |
|                     | 7 | 29.03. | 12.1 | 11.6 | 12.8 | 13.1 | 12.5 | 12.6 | 12.5 | 11.1 | 11.0 | 11.6 | 12.8 | 11.5 | 12.1 |
|                     | 8 | 03.04. | 11.4 | 10.5 | 11.2 | 11.6 | 10.8 | 10.5 | 12.7 | 12.8 | 10.6 | 11.8 | 12.4 | 10.8 | 11.4 |

|      |                            | Date | 1      | 2    | 3    | 4    | 5    | 6    | 7    | 8    | 9    | 10   | 11   | 12   | Av   |      |
|------|----------------------------|------|--------|------|------|------|------|------|------|------|------|------|------|------|------|------|
| 2012 | TSS (Total Soluble Solids) | 1    | 24.08. | 10.5 | 10.5 | 10.5 | 10.5 | 10   | 11.5 | 9.4  | 9.9  | 9.4  | 9.5  | 10   | 9.7  | 10.1 |
|      |                            | 2    | 28.08. | 11   | 9.8  | 9.8  | 9.4  | 10.5 | 9.3  | 9.8  | 10.6 | 11.7 | 9.7  | 9.8  | 10.7 | 10.2 |
|      |                            | 3    | 01.09. | 11   | 9.8  | 10.5 | 10.5 | 10.5 | 10.5 | 10.6 | 10.6 | 9.6  | 10.1 | 10.2 | 10.2 | 10.3 |
|      |                            | 4    | 06.09. | 12.2 | 12   | 12.4 | 12.1 | 11.5 | 10.1 | 10.6 | 10.2 | 10.5 | 10.8 | 10.1 | 10.9 | 11.1 |
|      |                            | 5    | 11.09. | 11.4 | 12.1 | 12.2 | 12.5 | 11.2 | 10.9 | 12.7 | 12.5 | 12.3 | 12.5 | 11.7 | 11.2 | 11.9 |
|      |                            | 6    | 16.09. | 12.9 | 13.7 | 11.2 | 11.9 | 11.7 | 12.7 | 12.1 | 10.7 | 11.7 | 13.7 | 12.1 | 12.3 | 12.2 |
|      |                            | 7    | 20.09. | 11.9 | 12.5 | 13.1 | 12.9 | 12.5 | 12.6 | 13.3 | 13.7 | 13.4 | 12.6 | 13.6 | 12.7 | 12.9 |
|      |                            | 8    | 24.09. | 14   | 12.9 | 13   | 13.1 | 13.9 | 13.2 | 13.3 | 13.8 | 14.3 | 14.6 | 14.3 | 14.6 | 13.8 |

|  |  | Date | 1 | 2 | 3 | 4 | 5 | 6 | 7 | 8 | 9 | 10 | 11 | 12 | 13 |
|--|--|------|---|---|---|---|---|---|---|---|---|----|----|----|----|
|--|--|------|---|---|---|---|---|---|---|---|---|----|----|----|----|



|  |                 |   |        |      |      |      |      |      |      |      |      |      |      |      |      |      |
|--|-----------------|---|--------|------|------|------|------|------|------|------|------|------|------|------|------|------|
|  | TSS (after stor | 5 | 25.03. | 12.7 | 12.5 | 13.4 | 13.8 | 12.2 | 12.1 | 11.9 | 13.2 | 13.4 | 12.5 | 12.5 | 12.5 | 12.7 |
|  |                 | 6 | 30.03. | 12.6 | 12.9 | 11.9 | 13.4 | 13.6 | 13.1 | 12.4 | 12.2 | 12.0 | 11.8 | 12.4 | 12.7 | 12.6 |
|  |                 | 7 | 03.04. | 11.7 | 10.7 | 10.8 | 11.6 | 11.5 | 12.2 | 12.4 | 12.5 | 11.5 | 11.8 | 11.1 | 12.2 | 11.7 |
|  |                 | 8 | 07.04. | 11.5 | 11.0 | 12.6 | 11.1 | 10.5 | 11.4 | 10.9 | 12.0 | 12.0 | 11.8 | 12.1 | 11.6 | 11.5 |

|      |                            | Date | 1      | 2    | 3    | 4    | 5    | 6    | 7    | 8    | 9    | 10   | 11   | 12   | Av   |      |
|------|----------------------------|------|--------|------|------|------|------|------|------|------|------|------|------|------|------|------|
| 2013 | TSS (Total Soluble Solids) | 1    | 17.08. | 9.3  | 10.2 | 10.3 | 9.5  | 9.7  | 9.0  | 10.2 | 9.6  | 8.8  | 8.7  | 9.1  | 8.6  | 9.4  |
|      |                            | 2    | 21.08. | 10.9 | 9.8  | 9.9  | 10.2 | 9.5  | 9.0  | 8.6  | 10.2 | 8.9  | 8.7  | 9.4  | 9.5  | 9.6  |
|      |                            | 3    | 26.08. | 11.1 | 11.6 | 10.3 | 10.9 | 11.2 | 11.0 | 10.0 | 10.3 | 10.9 | 11.5 | 11.3 | 10.7 | 10.9 |
|      |                            | 4    | 30.08. | 11.3 | 10.7 | 10.9 | 11.3 | 11.5 | 12.2 | 11.3 | 10.9 | 10.6 | 11.0 | 11.1 | 11.7 | 11.2 |
|      |                            | 5    | 04.09. | 12.2 | 13.0 | 10.5 | 11.2 | 11.0 | 12.0 | 11.4 | 10.0 | 11.0 | 13.0 | 11.4 | 11.6 | 11.5 |
|      |                            | 6    | 09.09. | 12.4 | 12.3 | 11.0 | 10.8 | 11.6 | 11.8 | 12.0 | 11.3 | 12.0 | 12.0 | 11.9 | 12.1 | 11.8 |
|      |                            | 7    | 13.09. | 11.5 | 11.6 | 12.2 | 12.6 | 12.5 | 11.5 | 12.2 | 11.5 | 12.0 | 11.6 | 11.8 | 12.1 | 11.9 |
|      |                            | 8    | 18.09. | 12.8 | 11.8 | 13.0 | 12.6 | 12.2 | 13.1 | 12.2 | 12.5 | 13.2 | 12.1 | 11.6 | 12.0 | 12.4 |

|                     |   | Date   | 1    | 2    | 3    | 4    | 5    | 6    | 7    | 8    | 9    | 10   | 11   | 12   | 13   |
|---------------------|---|--------|------|------|------|------|------|------|------|------|------|------|------|------|------|
| TSS (after storage) | 5 | 17.03. | 12.5 | 13.2 | 12.1 | 13.5 | 13.4 | 11.8 | 12.1 | 12.0 | 12.6 | 12.1 | 11.8 | 13.0 | 12.5 |
|                     | 6 | 22.03. | 12.4 | 13.0 | 13.1 | 12.4 | 12.4 | 12.6 | 11.8 | 11.8 | 11.5 | 13.2 | 12.8 | 12.1 | 12.4 |
|                     | 7 | 26.03. | 11.7 | 10.9 | 11.3 | 10.5 | 12.0 | 11.8 | 11.6 | 12.1 | 12.4 | 11.4 | 11.8 | 12.3 | 11.7 |
|                     | 8 | 31.03. | 12.2 | 11.5 | 11.6 | 12.6 | 12.2 | 12.6 | 12.3 | 11.6 | 11.9 | 11.5 | 11.7 | 11.2 | 11.9 |

|      |                            | Date | 1      | 2    | 3    | 4    | 5    | 6    | 7    | 8    | 9    | 10   | 11   | 12   | Av   |      |
|------|----------------------------|------|--------|------|------|------|------|------|------|------|------|------|------|------|------|------|
| 2014 | TSS (Total Soluble Solids) | 1    | 23.08. | 10.0 | 10.0 | 10.0 | 10.0 | 9.5  | 11.0 | 8.9  | 9.4  | 8.9  | 9.0  | 9.5  | 9.2  | 9.6  |
|      |                            | 2    | 27.08. | 10.5 | 9.3  | 9.3  | 8.9  | 10.0 | 8.8  | 9.3  | 10.1 | 11.2 | 10.4 | 9.3  | 10.2 | 9.8  |
|      |                            | 3    | 01.09. | 10.5 | 9.3  | 10.0 | 10.0 | 10.0 | 10.0 | 10.1 | 10.1 | 10.4 | 9.6  | 9.7  | 9.7  | 10.0 |
|      |                            | 4    | 04.09. | 10.8 | 11.2 | 11.2 | 10.7 | 11.0 | 10.4 | 10.7 | 10.7 | 10.0 | 10.4 | 10.2 | 11.0 | 10.7 |
|      |                            | 5    | 08.09. | 11.2 | 11.3 | 10.6 | 11.8 | 10.7 | 10.4 | 11.0 | 11.1 | 11.2 | 11.7 | 10.9 | 11.1 | 11.1 |
|      |                            | 6    | 12.09. | 11.7 | 11.8 | 11.2 | 12.1 | 11.0 | 11.1 | 11.0 | 11.4 | 11.7 | 11.0 | 11.8 | 12.2 | 11.5 |
|      |                            | 7    | 16.09. | 12.7 | 11.8 | 11.6 | 12.8 | 11.1 | 11.0 | 12.4 | 11.8 | 12.1 | 11.4 | 10.8 | 12.9 | 11.9 |
|      |                            | 8    | 20.09. | 12.4 | 10.9 | 12.1 | 13.0 | 12.6 | 13.3 | 12.4 | 12.4 | 12.0 | 11.8 | 12.6 | 13.2 | 12.4 |

|                     |   | Date   | 1    | 2    | 3    | 4    | 5    | 6    | 7    | 8    | 9    | 10   | 11   | 12   | 13   |
|---------------------|---|--------|------|------|------|------|------|------|------|------|------|------|------|------|------|
| TSS (after storage) | 5 | 26.03. | 12.1 | 12.6 | 11.4 | 11.6 | 12.8 | 13.1 | 11.5 | 11.7 | 11.8 | 11.5 | 12.6 | 12.8 | 12.1 |
|                     | 6 | 30.03. | 12.9 | 12.5 | 13.5 | 13.2 | 13.4 | 12.2 | 12.1 | 13.5 | 13.1 | 12.5 | 12.5 | 13.2 | 12.9 |
|                     | 7 | 03.04. | 12.2 | 12.3 | 12.4 | 11.4 | 11.6 | 13.2 | 13.5 | 13.4 | 12.2 | 11.5 | 11.3 | 11.1 | 12.2 |
|                     | 8 | 07.04. | 11.1 | 10.5 | 11.6 | 12.1 | 10.6 | 10.8 | 10.8 | 11.6 | 11.4 | 10.6 | 10.7 | 11.0 | 11.1 |

|    |                          | Date | 1      | 2    | 3    | 4    | 5    | 6    | 7    | 8    | 9    | 10   | 11   | 12   | Av   |      |
|----|--------------------------|------|--------|------|------|------|------|------|------|------|------|------|------|------|------|------|
| 15 | S (Total Soluble Solids) | 1    | 29.08. | 10.9 | 10.3 | 10.1 | 10.5 | 9.7  | 10.4 | 10.4 | 11.0 | 10.7 | 10.1 | 9.7  | 9.8  | 10.3 |
|    |                          | 2    | 02.09. | 10.7 | 9.6  | 10.3 | 10.1 | 10.9 | 11.1 | 11.3 | 10.6 | 11.3 | 11.3 | 11.2 | 11.8 | 10.9 |
|    |                          | 3    | 05.09. | 11.5 | 11.6 | 12.2 | 12.0 | 12.1 | 11.6 | 11.8 | 10.8 | 10.9 | 11.0 | 11.1 | 11.1 | 11.5 |
|    |                          | 4    | 09.09. | 12.5 | 12.4 | 12.6 | 11.7 | 11.8 | 11.4 | 12.4 | 11.4 | 11.5 | 11.7 | 11.1 | 11.1 | 11.8 |
|    |                          | 5    | 13.09. | 12.1 | 11.9 | 11.4 | 12.1 | 11.9 | 13.3 | 12.3 | 11.5 | 12.0 | 13.9 | 12.3 | 12.5 | 12.3 |
|    |                          | 6    | 17.09. | 12.3 | 13.2 | 11.9 | 11.7 | 12.5 | 12.7 | 12.9 | 12.2 | 12.9 | 12.9 | 12.8 | 13.0 | 12.6 |
|    |                          | 7    | 21.09. | 12.5 | 12.4 | 13.0 | 13.4 | 13.0 | 12.3 | 12.4 | 11.8 | 13.3 | 13.5 | 12.9 | 13.4 | 12.8 |

|      |                     |   |             |          |          |          |          |          |          |          |          |          |           |           |           |           |
|------|---------------------|---|-------------|----------|----------|----------|----------|----------|----------|----------|----------|----------|-----------|-----------|-----------|-----------|
| 2020 | TSS (after storage) | 8 | 26.09.      | 13.4     | 13.5     | 14.1     | 13.9     | 14.0     | 13.5     | 13.7     | 12.7     | 12.8     | 12.9      | 13.0      | 12.0      | 13.3      |
|      |                     |   | <i>Date</i> | <i>1</i> | <i>2</i> | <i>3</i> | <i>4</i> | <i>5</i> | <i>6</i> | <i>7</i> | <i>8</i> | <i>9</i> | <i>10</i> | <i>11</i> | <i>12</i> | <i>13</i> |
|      |                     | 5 | 15.03.      | 12.1     | 12.6     | 12.8     | 11.9     | 13.2     | 14.1     | 12.6     | 11.1     | 11.5     | 11.3      | 11.1      | 11.1      | 12.1      |
|      |                     | 6 | 19.03.      | 12.8     | 12.2     | 11.8     | 11.8     | 12.4     | 12.5     | 12.7     | 13.5     | 13.5     | 13.5      | 12.5      | 13.2      | 12.7      |
|      |                     | 7 | 23.03.      | 11.5     | 11.8     | 11.5     | 12.9     | 12.7     | 11.2     | 11.4     | 11.0     | 10.7     | 11.3      | 11.0      | 10.8      | 11.5      |
|      |                     | 8 | 28.03.      | 11.2     | 13.2     | 12.2     | 10.5     | 11.4     | 11.2     | 10.4     | 10.2     | 10.5     | 11.2      | 11.4      | 11.0      | 11.2      |

|      |                            |   |             |          |          |          |          |          |          |          |          |          |           |           |           |           |
|------|----------------------------|---|-------------|----------|----------|----------|----------|----------|----------|----------|----------|----------|-----------|-----------|-----------|-----------|
| 2016 | TSS (Total Soluble Solids) | 1 | -           |          |          |          |          |          |          |          |          |          |           |           |           | -         |
|      |                            | 2 | 24.08.      | 10.8     | 9.6      | 9.6      | 9.2      | 10.3     | 9.1      | 9.5      | 10.3     | 11.4     | 9.4       | 9.5       | 9.4       | 9.8       |
|      |                            | 3 | 27.08.      | 11.0     | 9.8      | 10.5     | 10.5     | 10.5     | 10.5     | 10.6     | 10.6     | 9.6      | 10.1      | 10.8      | 10.2      | 10.4      |
|      |                            | 4 | 31.09.      | 11.3     | 10.3     | 10.6     | 11.2     | 11.8     | 11.6     | 11.0     | 11.4     | 11.9     | 10.6      | 11.2      | 11.5      | 11.2      |
|      |                            | 5 | 07.09.      | 11.7     | 11.4     | 10.9     | 11.7     | 12.1     | 12.0     | 10.9     | 10.5     | 12.3     | 11.0      | 12.2      | 12.1      | 11.6      |
|      |                            | 6 | 12.09.      | 12.3     | 12.2     | 10.9     | 10.7     | 11.5     | 11.7     | 11.9     | 11.2     | 11.9     | 11.9      | 12.1      | 13.3      | 11.8      |
|      |                            | 7 | 16.09.      | 12.8     | 12.6     | 11.5     | 12.7     | 12.1     | 11.2     | 12.6     | 13.0     | 12.7     | 12.1      | 10.7      | 11.2      | 12.1      |
|      |                            | 8 | 20.09.      | 12.7     | 13.4     | 11.9     | 13.4     | 12.8     | 12.4     | 12.2     | 12.2     | 12.1     | 12.8      | 12.7      | 12.8      | 12.6      |
|      | TSS (after storage)        |   | <i>Date</i> | <i>1</i> | <i>2</i> | <i>3</i> | <i>4</i> | <i>5</i> | <i>6</i> | <i>7</i> | <i>8</i> | <i>9</i> | <i>10</i> | <i>11</i> | <i>12</i> | <i>13</i> |
|      |                            | 5 | 21.03.      | 13.1     | 13.5     | 13.2     | 12.6     | 12.5     | 12.8     | 13.2     | 13.2     | 12.6     | 12.8      | 13.5      | 13.5      | 13.0      |
|      |                            | 6 | 26.03.      | 12.8     | 12.4     | 12.5     | 13.2     | 13.1     | 12.4     | 12.6     | 12.5     | 12.8     | 13.1      | 12.5      | 12.6      | 12.7      |
|      |                            | 7 | 30.03.      | 12.2     | 11.8     | 11.8     | 12.4     | 12.0     | 12.0     | 12.6     | 11.7     | 11.5     | 11.4      | 12.8      | 12.6      | 12.1      |
|      |                            | 8 | 03.04.      | 11.2     | 10.6     | 12.3     | 11.1     | 11.2     | 10.5     | 11.2     | 11.4     | 10.7     | 10.5      | 11.0      | 10.8      | 11.2      |

|      |                            |   |             |          |          |          |          |          |          |          |          |          |           |           |           |           |
|------|----------------------------|---|-------------|----------|----------|----------|----------|----------|----------|----------|----------|----------|-----------|-----------|-----------|-----------|
| 2017 | TSS (Total Soluble Solids) | 1 | -           |          |          |          |          |          |          |          |          |          |           |           |           | -         |
|      |                            | 2 | 01.09.      | 10.3     | 9.2      | 9.3      | 9.6      | 8.9      | 8.4      | 8.0      | 9.6      | 8.3      | 8.1       | 8.8       | 8.9       | 9.0       |
|      |                            | 3 | 05.09.      | 10.9     | 10.7     | 11.1     | 10.8     | 10.2     | 8.8      | 9.3      | 8.9      | 9.2      | 9.5       | 8.8       | 9.6       | 9.8       |
|      |                            | 4 | 09.09.      | 10.6     | 9.8      | 10.9     | 9.2      | 9.5      | 10.0     | 9.2      | 9.1      | 8.9      | 9.1       | 9.4       | 9.4       | 9.6       |
|      |                            | 5 | 13.09.      | 10.1     | 10.8     | 10.9     | 11.2     | 9.9      | 9.6      | 11.4     | 11.2     | 11.0     | 11.2      | 10.4      | 11.4      | 10.8      |
|      |                            | 6 | 18.09.      | 11.4     | 11.3     | 10.0     | 9.8      | 10.6     | 10.8     | 11.0     | 10.3     | 11.0     | 11.0      | 11.2      | 12.4      | 10.9      |
|      |                            | 7 | 22.09.      | 10.3     | 10.6     | 11.2     | 11.8     | 11.6     | 11.2     | 11.3     | 12.0     | 12.4     | 12.1      | 11.3      | 12.3      | 11.5      |
|      |                            | 8 | 26.09.      | 12.0     | 11.5     | 11.9     | 12.1     | 12.6     | 12.4     | 14.4     | 11.8     | 11.9     | 12.8      | 12.6      | 12.5      | 12.4      |
|      | TSS (after storage)        |   | <i>Date</i> | <i>1</i> | <i>2</i> | <i>3</i> | <i>4</i> | <i>5</i> | <i>6</i> | <i>7</i> | <i>8</i> | <i>9</i> | <i>10</i> | <i>11</i> | <i>12</i> | <i>13</i> |
|      |                            | 5 | 17.03.      | 12.1     | 12.4     | 11.5     | 11.8     | 11.5     | 12.5     | 12.6     | 12.7     | 11.6     | 11.5      | 11.7      | 12.8      | 12.1      |
|      |                            | 6 | 22.03.      | 12.2     | 12.5     | 12.6     | 12.4     | 11.6     | 11.8     | 11.9     | 12.5     | 12.5     | 12.6      | 12.7      | 11.5      | 12.2      |
|      |                            | 7 | 26.03.      | 11.9     | 11.0     | 11.2     | 11.6     | 11.5     | 12.8     | 11.5     | 12.6     | 11.8     | 11.4      | 12.3      | 12.5      | 11.8      |
|      |                            | 8 | 30.03.      | 11.1     | 10.5     | 10.6     | 11.2     | 11.4     | 11.0     | 11.0     | 11.3     | 10.6     | 10.5      | 11.5      | 11.7      | 11.0      |

| 2007         |      |        | 2008  |    |        | 2009  |      |        | 2010  |   |        |       |
|--------------|------|--------|-------|----|--------|-------|------|--------|-------|---|--------|-------|
| TA (acidity) | Date | Av     | Date  | Av | Date   | Av    | Date | Av     |       |   |        |       |
|              | 1    | 28.08. | 0.242 | 1  | -      | -     | 1    | 15.08. | 0.309 | 1 | 16.08. | 0.318 |
|              | 2    | 01.09. | 0.268 | 2  | 15.08. | 0.374 | 2    | 20.08. | 0.285 | 2 | 21.08. | 0.287 |
|              | 3    | 05.09. | 0.224 | 3  | 20.08. | 0.353 | 3    | 24.08. | 0.244 | 3 | 25.08. | 0.258 |
|              | 4    | 10.09. | 0.203 | 4  | 25.08. | 0.312 | 4    | 28.08. | 0.237 | 4 | 30.08. | 0.236 |
|              | 5    | 15.09. | 0.186 | 5  | 29.08. | 0.296 | 5    | 02.09. | 0.199 | 5 | 03.09. | 0.206 |
|              | 6    | 19.09. | 0.152 | 6  | 03.09. | 0.278 | 6    | 07.09. | 0.182 | 6 | 07.09. | 0.185 |
|              | 7    | 24.09. | 0.139 | 7  | 08.09. | 0.262 | 7    | 12.09. | 0.163 | 7 | 11.09. | 0.171 |
|              | 8    | 29.09. | 0.155 | 8  | 13.09. | 0.253 | 8    | 16.09. | 0.159 | 8 | 16.09. | 0.151 |

| 2011 |        |       | 2012 |        |       | 2013 |        |       | 2014 |        |       |
|------|--------|-------|------|--------|-------|------|--------|-------|------|--------|-------|
|      | Date   | Av    |
| 1    | 25.08. | 0.265 | 1    | 24.08. | 0.296 | 1    | 17.08. | 0.394 | 1    | 29.08. | 0.288 |
| 2    | 30.08. | 0.277 | 2    | 28.08. | 0.258 | 2    | 21.08. | 0.367 | 2    | 02.09. | 0.261 |
| 3    | 03.09. | 0.245 | 3    | 01.09. | 0.254 | 3    | 26.08. | 0.375 | 3    | 05.09. | 0.273 |
| 4    | 08.09. | 0.234 | 4    | 06.09. | 0.201 | 4    | 30.08. | 0.328 | 4    | 09.09. | 0.247 |
| 5    | 12.09. | 0.203 | 5    | 11.09. | 0.192 | 5    | 04.09. | 0.314 | 5    | 13.09. | 0.197 |
| 6    | 17.09. | 0.188 | 6    | 16.09. | 0.180 | 6    | 09.09. | 0.293 | 6    | 17.09. | 0.188 |
| 7    | 21.09. | 0.166 | 7    | 20.09. | 0.167 | 7    | 13.09. | 0.266 | 7    | 21.09. | 0.168 |
| 8    | 26.09. | 0.163 | 8    | 24.09. | 0.155 | 8    | 18.09. | 0.275 | 8    | 25.09. | 0.153 |

| 2015 |             |           | 2016 |             |           | 2017 |             |           |
|------|-------------|-----------|------|-------------|-----------|------|-------------|-----------|
|      | <i>Date</i> | <i>Av</i> |      | <i>Date</i> | <i>Av</i> |      | <i>Date</i> | <i>Av</i> |
| 1    | 29.08.      | 0.303     | 1    | -           | -         | 1    | -           | -         |
| 2    | 02.09.      | 0.292     | 2    | 24.08.      | 0.205     | 2    | 01.09.      | 0.297     |
| 3    | 05.09.      | 0.278     | 3    | 27.08.      | 0.212     | 3    | 05.09.      | 0.272     |
| 4    | 09.09.      | 0.254     | 4    | 31.09.      | 0.179     | 4    | 09.09.      | 0.220     |
| 5    | 13.09.      | 0.198     | 5    | 07.09.      | 0.173     | 5    | 13.09.      | 0.214     |
| 6    | 17.09.      | 0.193     | 6    | 12.09.      | 0.165     | 6    | 18.09.      | 0.201     |
| 7    | 21.09.      | 0.162     | 7    | 16.09.      | 0.153     | 7    | 22.09.      | 0.186     |
| 8    | 26.09.      | 0.137     | 8    | 20.09.      | 0.133     | 8    | 26.09.      | 0.165     |

|      |        |   | Date   | 1  | 2  | 3  | 4  | 5  | 6  | 7  | 8  | 9  | 10 | Av    |
|------|--------|---|--------|----|----|----|----|----|----|----|----|----|----|-------|
| 2007 | Starch | 1 | 28.08. | 2  | 1  | 2  | 2  | 2  | 1  | 1  | 1  | 1  | 1  | 1.40  |
|      |        | 2 | 01.09. | 2  | 2  | 3  | 2  | 2  | 3  | 1  | 1  | 1  | 2  | 1.90  |
|      |        | 3 | 05.09. | 1  | 1  | 2  | 2  | 3  | 3  | 3  | 3  | 3  | 4  | 2.50  |
|      |        | 4 | 10.09. | 3  | 3  | 4  | 4  | 4  | 5  | 5  | 6  | 6  | 7  | 4.70  |
|      |        | 5 | 15.09. | 7  | 7  | 6  | 7  | 8  | 8  | 7  | 6  | 9  | 9  | 7.40  |
|      |        | 6 | 19.09. | 9  | 9  | 10 | 8  | 8  | 9  | 8  | 9  | 7  | 10 | 8.70  |
|      |        | 7 | 24.09. | 10 | 10 | 10 | 10 | 10 | 10 | 10 | 10 | 9  | 9  | 9.80  |
|      |        | 8 | 29.09. | 10 | 10 | 10 | 10 | 10 | 10 | 10 | 10 | 10 | 10 | 10.00 |
| 2008 | Starch | 1 | -      | -  | -  | -  | -  | -  | -  | -  | -  | -  | -  | -     |
|      |        | 2 | 15.08. | 1  | 1  | 2  | 1  | 2  | 1  | 1  | 2  | 1  | 1  | 1.30  |
|      |        | 3 | 20.08. | 2  | 1  | 2  | 2  | 3  | 2  | 3  | 2  | 3  | 3  | 2.30  |
|      |        | 4 | 25.08. | 4  | 3  | 2  | 3  | 3  | 4  | 4  | 4  | 4  | 3  | 3.40  |
|      |        | 5 | 29.08. | 5  | 5  | 5  | 4  | 4  | 7  | 7  | 7  | 6  | 6  | 5.60  |
|      |        | 6 | 03.09. | 7  | 6  | 7  | 7  | 6  | 8  | 8  | 6  | 7  | 8  | 7.00  |
|      |        | 7 | 08.09. | 9  | 10 | 9  | 9  | 9  | 9  | 10 | 10 | 9  | 9  | 9.30  |
|      |        | 8 | 13.09. | 10 | 10 | 10 | 10 | 10 | 10 | 10 | 10 | 10 | 9  | 9.90  |
| 2009 | Starch | 1 | 15.08. | 1  | 1  | 1  | 1  | 1  | 1  | 1  | 1  | 1  | 1  | 1.00  |
|      |        | 2 | 20.08. | 2  | 1  | 2  | 2  | 1  | 1  | 1  | 1  | 1  | 1  | 1.30  |
|      |        | 3 | 24.08. | 2  | 2  | 2  | 1  | 1  | 2  | 2  | 2  | 3  | 3  | 2.00  |
|      |        | 4 | 28.08. | 1  | 2  | 3  | 2  | 4  | 4  | 2  | 3  | 3  | 2  | 2.60  |
|      |        | 5 | 02.09. | 3  | 3  | 3  | 4  | 4  | 3  | 3  | 6  | 6  | 6  | 4.10  |
|      |        | 6 | 07.09. | 3  | 3  | 4  | 4  | 4  | 5  | 6  | 7  | 7  | 8  | 5.10  |
|      |        | 7 | 12.09. | 6  | 6  | 7  | 7  | 8  | 8  | 8  | 9  | 10 | 10 | 7.90  |
|      |        | 8 | 16.09. | 8  | 8  | 9  | 9  | 9  | 9  | 10 | 10 | 10 | 10 | 9.20  |
| 2010 | Starch | 1 | 16.08. | 1  | 1  | 1  | 1  | 1  | 1  | 1  | 1  | 1  | 1  | 1.00  |
|      |        | 2 | 21.08. | 1  | 1  | 1  | 1  | 1  | 1  | 1  | 1  | 1  | 1  | 1.00  |
|      |        | 3 | 25.08. | 1  | 1  | 1  | 1  | 1  | 1  | 1  | 2  | 2  | 2  | 1.30  |
|      |        | 4 | 30.08. | 1  | 2  | 3  | 3  | 2  | 2  | 2  | 2  | 3  | 3  | 2.30  |
|      |        | 5 | 03.09. | 1  | 2  | 2  | 2  | 3  | 3  | 3  | 4  | 4  | 5  | 2.90  |
|      |        | 6 | 07.09. | 5  | 5  | 6  | 4  | 5  | 5  | 4  | 5  | 5  | 6  | 5.00  |
|      |        | 7 | 11.09. | 7  | 7  | 7  | 8  | 8  | 8  | 8  | 9  | 10 | 10 | 8.20  |
|      |        | 8 | 16.09. | 10 | 10 | 10 | 9  | 9  | 9  | 8  | 8  | 10 | 10 | 9.30  |
| 2011 | Starch | 1 | 25.08. | 1  | 1  | 1  | 1  | 1  | 1  | 2  | 2  | 2  | 2  | 1.40  |
|      |        | 2 | 30.08. | 1  | 2  | 1  | 2  | 2  | 2  | 2  | 3  | 3  | 3  | 2.10  |
|      |        | 3 | 03.09. | 1  | 2  | 2  | 3  | 3  | 3  | 4  | 4  | 5  | 5  | 3.20  |
|      |        | 4 | 08.09. | 4  | 4  | 4  | 5  | 5  | 6  | 6  | 6  | 7  | 7  | 5.40  |
|      |        | 5 | 12.09. | 6  | 6  | 7  | 8  | 9  | 9  | 9  | 8  | 6  | 7  | 7.50  |
|      |        | 6 | 17.09. | 7  | 7  | 8  | 8  | 9  | 9  | 9  | 10 | 10 | 10 | 8.70  |
|      |        | 7 | 21.09. | 8  | 8  | 8  | 9  | 10 | 10 | 10 | 10 | 10 | 10 | 9.30  |



|      |        |   |        |    |    |    |    |    |   |   |   |    |    |      |
|------|--------|---|--------|----|----|----|----|----|---|---|---|----|----|------|
| 2017 | Starch | 2 | 01.09. | 2  | 1  | 1  | 1  | 1  | 1 | 1 | 1 | 1  | 1  | 1.10 |
|      |        | 3 | 05.09. | 4  | 2  | 2  | 3  | 2  | 4 | 1 | 2 | 2  | 2  | 2.40 |
|      |        | 4 | 09.09. | 5  | 5  | 3  | 5  | 4  | 6 | 5 | 3 | 4  | 6  | 4.60 |
|      |        | 5 | 13.09. | 5  | 7  | 5  | 4  | 6  | 5 | 5 | 6 | 5  | 6  | 5.40 |
|      |        | 6 | 18.09. | 7  | 9  | 5  | 7  | 7  | 9 | 9 | 5 | 5  | 6  | 6.90 |
|      |        | 7 | 22.09. | 9  | 9  | 9  | 8  | 7  | 8 | 9 | 9 | 7  | 8  | 8.30 |
|      |        | 8 | 26.09. | 10 | 10 | 10 | 10 | 10 | 9 | 9 | 9 | 10 | 10 | 9.70 |

|      |              | Date   | 1      | 2     | 3     | 4     | 5     | 6     | 7     | 8     | 9     | 10    | Av    |       |
|------|--------------|--------|--------|-------|-------|-------|-------|-------|-------|-------|-------|-------|-------|-------|
| 2007 | StREIF Index | 1      | 28.08. | 5.71  | 12.78 | 6.36  | 6.55  | 5.59  | 13.10 | 11.56 | 13.68 | 14.07 | 14.50 | 10.39 |
|      |              | 2      | 01.09. | 5.94  | 4.98  | 4.32  | 5.59  | 6.01  | 3.44  | 11.47 | 12.95 | 10.69 | 5.43  | 7.08  |
|      |              | 3      | 05.09. | 10.00 | 11.25 | 4.95  | 5.48  | 3.77  | 2.99  | 3.33  | 3.67  | 3.41  | 2.91  | 5.18  |
|      |              | 4      | 10.09. | 3.22  | 2.99  | 2.25  | 2.50  | 2.40  | 2.27  | 2.01  | 1.55  | 1.72  | 1.44  | 2.24  |
|      |              | 5      | 15.09. | 1.30  | 1.41  | 1.43  | 1.22  | 1.15  | 1.13  | 1.41  | 1.45  | 1.03  | 0.98  | 1.25  |
|      |              | 6      | 19.09. | 1.03  | 0.99  | 0.86  | 1.01  | 1.01  | 0.91  | 0.96  | 0.85  | 1.12  | 0.87  | 0.96  |
|      |              | 7      | 24.09. | 0.63  | 0.64  | 0.67  | 0.76  | 0.72  | 0.63  | 0.72  | 0.67  | 0.73  | 0.70  | 0.69  |
|      |              | 8      | 29.09. | 0.63  | 0.67  | 0.60  | 0.64  | 0.59  | 0.67  | 0.58  | 0.62  | 0.62  | 0.60  | 0.62  |
| 2008 | StREIF Index | 1      | -      | -     | -     | -     | -     | -     | -     | -     | -     | -     | -     | -     |
|      |              | 2      | 15.08. | 11.06 | 11.89 | 6.11  | 11.23 | 5.79  | 13.83 | 13.95 | 5.66  | 13.37 | 13.39 | 10.63 |
|      |              | 3      | 20.08. | 4.96  | 9.96  | 4.91  | 4.82  | 3.78  | 6.12  | 3.70  | 6.37  | 3.89  | 3.63  | 5.21  |
|      |              | 4      | 25.08. | 2.60  | 3.40  | 4.61  | 3.86  | 4.13  | 2.72  | 2.82  | 2.71  | 2.93  | 3.75  | 3.35  |
|      |              | 5      | 29.08. | 2.07  | 1.92  | 1.94  | 2.29  | 2.52  | 1.55  | 1.26  | 1.37  | 1.52  | 1.45  | 1.79  |
|      |              | 6      | 03.09. | 1.18  | 1.41  | 1.35  | 1.49  | 1.34  | 1.09  | 1.09  | 1.50  | 1.16  | 0.98  | 1.26  |
|      |              | 7      | 08.09. | 0.91  | 0.83  | 0.92  | 0.88  | 0.84  | 0.84  | 0.78  | 0.78  | 0.84  | 0.81  | 0.84  |
|      |              | 8      | 13.09. | 0.73  | 0.81  | 0.79  | 0.73  | 0.66  | 0.67  | 0.61  | 0.71  | 0.67  | 0.73  | 0.71  |
| 2009 | StREIF Index | 1      | 15.08. | 12.30 | 13.32 | 13.82 | 13.60 | 15.30 | 12.37 | 13.27 | 11.48 | 13.88 | 12.30 | 13.16 |
|      |              | 2      | 20.08. | 5.46  | 10.26 | 5.98  | 5.42  | 13.26 | 10.45 | 11.20 | 8.91  | 9.55  | 10.32 | 9.08  |
|      |              | 3      | 24.08. | 5.00  | 4.86  | 5.46  | 12.38 | 11.43 | 5.00  | 5.63  | 5.45  | 4.11  | 3.94  | 6.33  |
|      |              | 4      | 28.08. | 11.29 | 5.09  | 3.11  | 5.26  | 2.32  | 2.79  | 4.80  | 3.09  | 3.95  | 5.09  | 4.68  |
|      |              | 5      | 02.09. | 2.92  | 2.32  | 3.25  | 2.22  | 2.42  | 2.78  | 3.06  | 1.68  | 1.50  | 1.28  | 2.34  |
|      |              | 6      | 07.09. | 2.44  | 2.55  | 2.35  | 2.21  | 2.05  | 1.58  | 1.47  | 1.31  | 1.17  | 1.05  | 1.82  |
|      |              | 7      | 12.09. | 1.03  | 1.00  | 0.96  | 0.88  | 0.81  | 0.79  | 0.82  | 0.82  | 0.65  | 0.66  | 0.84  |
|      |              | 8      | 16.09. | 0.76  | 0.70  | 0.77  | 0.69  | 0.58  | 0.66  | 0.61  | 0.55  | 0.65  | 0.70  | 0.67  |
| 2010 | StREIF Index | 1      | 16.08. | 11.96 | 13.23 | 14.01 | 13.21 | 11.90 | 12.20 | 12.55 | 13.56 | 12.94 | 14.20 | 12.98 |
|      |              | 2      | 21.08. | 11.41 | 10.34 | 11.60 | 11.22 | 13.21 | 12.44 | 11.81 | 11.37 | 10.48 | 13.21 | 11.71 |
|      |              | 3      | 25.08. | 9.30  | 9.56  | 11.03 | 9.69  | 10.19 | 10.81 | 9.56  | 4.81  | 4.85  | 5.09  | 8.49  |
|      |              | 4      | 30.08. | 8.44  | 4.45  | 2.93  | 3.23  | 5.27  | 5.08  | 4.45  | 4.39  | 3.23  | 3.51  | 4.50  |
|      |              | 5      | 03.09. | 9.28  | 4.42  | 4.83  | 4.39  | 3.56  | 2.87  | 2.57  | 2.42  | 2.21  | 1.90  | 3.85  |
|      |              | 6      | 07.09. | 1.60  | 1.73  | 1.56  | 2.18  | 1.83  | 1.69  | 2.05  | 1.75  | 1.57  | 1.45  | 1.74  |
|      |              | 7      | 11.09. | 1.12  | 0.97  | 1.24  | 0.90  | 1.15  | 0.99  | 0.92  | 0.94  | 0.75  | 0.70  | 0.97  |
|      |              | 8      | 16.09. | 0.72  | 0.76  | 0.78  | 0.77  | 0.71  | 0.77  | 0.95  | 0.89  | 0.70  | 0.81  | 0.79  |
| 2011 | StREIF Index | 1      | 25.08. | 13.13 | 13.12 | 11.93 | 12.74 | 12.17 | 13.59 | 6.89  | 6.46  | 6.25  | 6.55  | 10.28 |
|      |              | 2      | 30.08. | 11.28 | 6.39  | 12.53 | 6.85  | 5.75  | 6.25  | 6.17  | 3.86  | 3.42  | 4.37  | 6.69  |
|      |              | 3      | 03.09. | 12.60 | 5.93  | 6.30  | 4.46  | 3.63  | 3.98  | 2.99  | 2.90  | 2.11  | 2.45  | 4.74  |
|      |              | 4      | 08.09. | 2.39  | 2.76  | 2.85  | 1.76  | 2.16  | 1.79  | 1.87  | 1.79  | 1.49  | 1.37  | 2.02  |
|      |              | 5      | 12.09. | 1.55  | 1.36  | 1.36  | 1.26  | 1.07  | 1.06  | 1.15  | 1.38  | 1.54  | 1.38  | 1.31  |
|      |              | 6      | 17.09. | 1.15  | 1.25  | 1.12  | 1.24  | 1.03  | 1.13  | 1.04  | 0.94  | 0.93  | 0.99  | 1.08  |
|      |              | 7      | 21.09. | 1.02  | 1.11  | 1.14  | 0.91  | 0.83  | 0.96  | 0.89  | 0.74  | 0.78  | 0.96  | 0.93  |
|      |              | 8      | 26.09. | 0.83  | 0.89  | 0.79  | 0.69  | 0.73  | 0.88  | 0.83  | 0.89  | 0.79  | 0.69  | 0.80  |
| dex  | 1            | 24.08. | 11.48  | 12.71 | 11.67 | 11.48 | 11.25 | 9.91  | 12.07 | 11.72 | 6.09  | 6.29  | 10.47 |       |
|      | 2            | 28.08. | 10.77  | 11.94 | 12.14 | 12.29 | 10.81 | 6.34  | 5.79  | 5.71  | 3.22  | 3.78  | 8.28  |       |
|      | 3            | 01.09. | 9.91   | 11.68 | 10.95 | 5.19  | 4.93  | 4.95  | 3.41  | 3.30  | 3.49  | 2.57  | 6.04  |       |

|      |              |   |        |       |       |       |       |       |       |       |       |       |       |       |
|------|--------------|---|--------|-------|-------|-------|-------|-------|-------|-------|-------|-------|-------|-------|
| 2012 | StREIF In    | 4 | 06.09. | 4.20  | 4.31  | 4.35  | 4.38  | 3.06  | 3.38  | 2.44  | 2.65  | 2.52  | 2.56  | 3.39  |
|      |              | 5 | 11.09. | 4.21  | 2.38  | 2.51  | 1.85  | 2.06  | 2.36  | 1.65  | 1.50  | 1.39  | 1.02  | 2.09  |
|      |              | 6 | 16.09. | 2.51  | 2.42  | 2.11  | 2.04  | 1.63  | 1.44  | 1.54  | 1.41  | 1.20  | 0.94  | 1.72  |
|      |              | 7 | 20.09. | 1.09  | 0.97  | 1.02  | 0.87  | 0.92  | 0.73  | 0.74  | 0.68  | 0.70  | 0.68  | 0.84  |
|      |              | 8 | 24.09. | 0.77  | 0.88  | 0.54  | 0.78  | 0.65  | 0.67  | 0.66  | 0.59  | 0.57  | 0.52  | 0.66  |
| 2013 | StREIF Index | 1 | 17.08. | 13.23 | 12.50 | 11.65 | 13.58 | 12.27 | 14.11 | 12.89 | 12.81 | 7.47  | 7.24  | 11.78 |
|      |              | 2 | 21.08. | 11.01 | 11.99 | 10.66 | 11.42 | 6.05  | 6.67  | 7.50  | 5.81  | 6.54  | 3.43  | 8.11  |
|      |              | 3 | 26.08. | 4.86  | 4.89  | 5.46  | 3.49  | 3.36  | 3.29  | 3.77  | 2.61  | 2.59  | 2.25  | 3.66  |
|      |              | 4 | 30.08. | 4.49  | 2.42  | 2.27  | 1.84  | 1.93  | 1.89  | 2.04  | 1.94  | 1.29  | 1.25  | 2.14  |
|      |              | 5 | 04.09. | 1.28  | 1.20  | 1.44  | 1.43  | 1.48  | 1.13  | 1.23  | 1.15  | 1.02  | 0.83  | 1.22  |
|      |              | 6 | 09.09. | 0.94  | 0.93  | 0.99  | 1.05  | 0.92  | 0.91  | 0.86  | 0.88  | 0.77  | 0.75  | 0.90  |
|      |              | 7 | 13.09. | 0.88  | 0.82  | 0.79  | 0.82  | 0.69  | 0.75  | 0.75  | 0.84  | 0.71  | 0.74  | 0.78  |
|      |              | 8 | 18.09. | 0.65  | 0.67  | 0.65  | 0.54  | 0.73  | 0.65  | 0.70  | 0.64  | 0.61  | 0.69  | 0.65  |
| 2014 | StREIF Index | 1 | 23.08. | 12.35 | 12.50 | 11.65 | 12.25 | 12.79 | 11.09 | 13.65 | 12.98 | 13.65 | 13.44 | 12.64 |
|      |              | 2 | 27.08. | 10.62 | 12.47 | 12.26 | 12.42 | 11.60 | 6.73  | 6.37  | 5.72  | 5.00  | 3.56  | 8.68  |
|      |              | 3 | 01.09. | 10.86 | 6.18  | 5.58  | 5.85  | 5.45  | 3.62  | 3.48  | 3.48  | 3.54  | 2.98  | 5.10  |
|      |              | 4 | 04.09. | 3.29  | 3.20  | 3.01  | 2.66  | 2.42  | 1.95  | 1.97  | 1.97  | 1.72  | 1.70  | 2.39  |
|      |              | 5 | 08.09. | 2.21  | 1.65  | 1.86  | 1.32  | 1.59  | 1.45  | 1.35  | 1.14  | 1.18  | 1.13  | 1.49  |
|      |              | 6 | 12.09. | 1.39  | 1.43  | 1.38  | 1.16  | 1.27  | 1.26  | 1.27  | 1.07  | 0.93  | 0.89  | 1.21  |
|      |              | 7 | 16.09. | 0.90  | 0.99  | 1.02  | 0.81  | 0.97  | 0.91  | 0.73  | 0.86  | 0.79  | 0.78  | 0.88  |
|      |              | 8 | 20.09. | 0.72  | 0.81  | 0.70  | 0.71  | 0.68  | 0.64  | 0.71  | 0.70  | 0.74  | 0.71  | 0.71  |
| 2015 | StREIF Index | 1 | 29.08. | 11.28 | 11.80 | 11.09 | 11.33 | 12.58 | 11.78 | 11.73 | 10.86 | 11.26 | 12.03 | 11.57 |
|      |              | 2 | 02.09. | 11.54 | 12.81 | 11.26 | 12.43 | 5.57  | 5.74  | 5.53  | 5.92  | 3.50  | 3.75  | 7.81  |
|      |              | 3 | 05.09. | 10.39 | 5.39  | 3.35  | 3.06  | 2.91  | 3.46  | 3.31  | 2.73  | 2.64  | 2.03  | 3.93  |
|      |              | 4 | 09.09. | 1.48  | 2.82  | 1.77  | 1.88  | 3.38  | 2.59  | 2.35  | 2.60  | 2.08  | 1.98  | 2.29  |
|      |              | 5 | 13.09. | 1.38  | 1.37  | 1.74  | 1.20  | 1.36  | 1.27  | 1.41  | 1.44  | 1.63  | 1.01  | 1.38  |
|      |              | 6 | 17.09. | 1.11  | 0.94  | 1.09  | 1.02  | 0.97  | 1.03  | 0.87  | 0.89  | 0.76  | 0.70  | 0.94  |
|      |              | 7 | 21.09. | 0.80  | 0.73  | 0.72  | 0.66  | 0.64  | 0.74  | 0.76  | 0.81  | 0.68  | 0.70  | 0.72  |
|      |              | 8 | 26.09. | 0.70  | 0.60  | 0.58  | 0.61  | 0.58  | 0.63  | 0.61  | 0.70  | 0.66  | 0.63  | 0.63  |
| 2016 | StREIF Index | 1 | -      | -     | -     | -     | -     | -     | -     | -     | -     | -     | -     | -     |
|      |              | 2 | 01.09. | 10.56 | 11.67 | 12.55 | 12.45 | 12.23 | 12.53 | 11.79 | 11.70 | 10.04 | 13.40 | 11.89 |
|      |              | 3 | 05.09. | 10.00 | 11.33 | 11.00 | 10.81 | 10.76 | 5.24  | 5.24  | 5.45  | 5.91  | 5.59  | 8.13  |
|      |              | 4 | 09.09. | 8.50  | 9.13  | 9.67  | 4.31  | 4.58  | 4.14  | 2.85  | 3.00  | 2.70  | 2.55  | 5.14  |
|      |              | 5 | 13.09. | 4.12  | 4.19  | 3.13  | 2.75  | 2.23  | 2.06  | 1.78  | 1.99  | 1.57  | 1.94  | 2.58  |
|      |              | 6 | 18.09. | 3.72  | 3.67  | 3.00  | 2.15  | 1.50  | 1.28  | 0.92  | 1.09  | 0.97  | 1.10  | 1.94  |
|      |              | 7 | 22.09. | 1.41  | 1.40  | 1.32  | 1.13  | 1.36  | 1.16  | 0.76  | 0.83  | 0.79  | 0.71  | 1.09  |
|      |              | 8 | 26.09. | 1.03  | 0.82  | 0.97  | 0.71  | 0.71  | 0.86  | 0.75  | 0.71  | 0.75  | 0.69  | 0.80  |
| 2017 | StREIF Index | 1 | -      | -     | -     | -     | -     | -     | -     | -     | -     | -     | -     | -     |
|      |              | 2 | 01.09. | 6.00  | 12.99 | 13.33 | 12.24 | 12.70 | 15.18 | 15.38 | 12.34 | 14.70 | 14.75 | 12.96 |
|      |              | 3 | 05.09. | 2.65  | 5.33  | 5.25  | 3.44  | 6.08  | 3.31  | 11.99 | 6.88  | 6.30  | 5.87  | 5.71  |
|      |              | 4 | 09.09. | 2.20  | 2.16  | 3.24  | 2.47  | 3.29  | 1.93  | 2.40  | 3.85  | 3.13  | 2.00  | 2.67  |
|      |              | 5 | 13.09. | 2.17  | 1.43  | 2.02  | 2.38  | 1.76  | 2.27  | 1.83  | 1.67  | 1.89  | 1.50  | 1.89  |
|      |              | 6 | 18.09. | 1.28  | 1.02  | 2.06  | 1.63  | 1.25  | 1.05  | 1.06  | 1.96  | 1.77  | 1.42  | 1.45  |
|      |              | 7 | 22.09. | 0.98  | 0.99  | 0.99  | 1.06  | 1.16  | 1.02  | 0.92  | 0.92  | 1.15  | 0.97  | 1.02  |
|      |              | 8 | 26.09. | 0.78  | 0.87  | 0.84  | 0.78  | 0.70  | 0.80  | 0.72  | 0.85  | 0.72  | 0.70  | 0.78  |



total fruits number per box

| 2007   |        |        |        | 2008   |        |        |        | 2009   |        |        |        |
|--------|--------|--------|--------|--------|--------|--------|--------|--------|--------|--------|--------|
| H1     | H2     | H3     | H4     | H1     | H2     | H3     | H4     | H1     | H2     | H3     | H4     |
| 15.09. | 19.09. | 24.09. | 29.09. | 29.08. | 03.09. | 08.09. | 13.09. | 02.09. | 07.09. | 12.09. | 16.09. |
| 50     | 61     | 58     | 54     | 56     | 54     | 52     | 51     | 54     | 54     | 55     | 61     |
| 58     | 54     | 55     | 56     | 52     | 58     | 55     | 54     | 53     | 52     | 55     | 54     |
| 56     | 55     | 58     | 62     | 61     | 62     | 56     | 54     | 57     | 55     | 54     | 51     |
| 52     | 52     | 60     | 54     | 54     | 56     | 54     | 52     | 57     | 58     | 59     | 58     |
| 54.0   | 55.5   | 57.8   | 56.5   | 55.8   | 57.5   | 54.3   | 52.8   | 55.3   | 54.8   | 55.8   | 56.0   |

| 2010   |        |        |        | 2011   |        |        |        | 2012   |        |        |        |
|--------|--------|--------|--------|--------|--------|--------|--------|--------|--------|--------|--------|
| H1     | H2     | H3     | H4     | H1     | H2     | H3     | H4     | H1     | H2     | H3     | H4     |
| 03.09. | 07.09. | 11.09. | 16.09. | 12.09. | 17.09. | 21.09. | 26.09. | 11.09. | 15.09. | 20.09. | 24.09. |
| 57     | 56     | 58     | 54     | 52     | 58     | 55     | 54     | 56     | 51     | 52     | 54     |
| 59     | 58     | 55     | 58     | 50     | 61     | 58     | 54     | 58     | 57     | 54     | 61     |
| 61     | 60     | 52     | 53     | 58     | 54     | 55     | 56     | 55     | 56     | 58     | 65     |
| 56     | 54     | 57     | 56     | 58     | 57     | 56     | 57     | 57     | 58     | 56     | 58     |
| 58.3   | 57.0   | 55.5   | 55.3   | 54.5   | 57.5   | 56.0   | 55.3   | 56.5   | 55.5   | 55.0   | 59.5   |

| 2013   |        |        |        | 2014   |        |        |        | 2015   |        |        |        |
|--------|--------|--------|--------|--------|--------|--------|--------|--------|--------|--------|--------|
| H1     | H2     | H3     | H4     | H1     | H2     | H3     | H4     | H1     | H2     | H3     | H4     |
| 04.09. | 09.09. | 13.09. | 18.09. | 08.09. | 12.09. | 16.09. | 20.09. | 13.09. | 17.09. | 21.09. | 25.09. |
| 54     | 57     | 52     | 58     | 54     | 55     | 56     | 55     | 51     | 61     | 60     | 57     |
| 53     | 59     | 50     | 61     | 54     | 55     | 58     | 53     | 61     | 60     | 58     | 60     |
| 57     | 61     | 58     | 54     | 57     | 58     | 64     | 61     | 59     | 57     | 54     | 56     |
| 57     | 56     | 58     | 57     | 56     | 58     | 59     | 58     | 61     | 60     | 58     | 55     |
| 55.3   | 58.3   | 54.5   | 57.5   | 55.3   | 56.5   | 59.3   | 56.8   | 58.0   | 59.5   | 57.5   | 57.0   |

| 2016   |        |        |        | 2017   |        |        |        |
|--------|--------|--------|--------|--------|--------|--------|--------|
| H1     | H2     | H3     | H4     | H1     | H2     | H3     | H4     |
| 07.09. | 12.09. | 16.09. | 20.09. | 13.09. | 18.09. | 22.09. | 26.09. |
| 60     | 62     | 56     | 57     | 54     | 62     | 51     | 55     |
| 57     | 54     | 58     | 62     | 61     | 60     | 58     | 58     |
| 50     | 61     | 58     | 54     | 58     | 56     | 54     | 57     |
| 58     | 54     | 55     | 56     | 57     | 58     | 55     | 56     |
| 56.3   | 57.8   | 56.8   | 57.3   | 57.5   | 59.0   | 54.5   | 56.5   |

number of fruits with disorders per box

| 2007   |        |        |        | 2008   |        |        |        | 2009   |        |        |        |
|--------|--------|--------|--------|--------|--------|--------|--------|--------|--------|--------|--------|
| H1     | H2     | H3     | H4     | H1     | H2     | H3     | H4     | H1     | H2     | H3     | H4     |
| 15.09. | 19.09. | 24.09. | 29.09. | 29.08. | 03.09. | 08.09. | 13.09. | 02.09. | 07.09. | 12.09. | 16.09. |
| 2      | 2      | 5      | 6      | 2      | 1      | 2      | 5      | 2      | 1      | 0      | 2      |
| 1      | 3      | 6      | 7      | 1      | 2      | 3      | 4      | 4      | 1      | 1      | 6      |
| 1      | 5      | 4      | 6      | 1      | 1      | 3      | 4      | 2      | 2      | 3      | 5      |
| 1      | 2      | 3      | 8      | 1      | 2      | 3      | 2      | 1      | 1      | 4      | 4      |

Num

|     |     |     |     |     |     |     |     |     |     |     |     |
|-----|-----|-----|-----|-----|-----|-----|-----|-----|-----|-----|-----|
| 1.3 | 3.0 | 4.5 | 6.8 | 1.3 | 1.5 | 2.8 | 3.8 | 2.3 | 1.3 | 2.0 | 4.3 |
|-----|-----|-----|-----|-----|-----|-----|-----|-----|-----|-----|-----|

| 2010   |        |        |        | 2011   |        |        |        | 2012   |        |        |        |
|--------|--------|--------|--------|--------|--------|--------|--------|--------|--------|--------|--------|
| H1     | H2     | H3     | H4     | H1     | H2     | H3     | H4     | H1     | H2     | H3     | H4     |
| 03.09. | 07.09. | 11.09. | 16.09. | 12.09. | 17.09. | 21.09. | 26.09. | 11.09. | 15.09. | 20.09. | 24.09. |
| 4      | 3      | 1      | 1      | 2      | 2      | 0      | 5      | 1      | 2      | 1      | 2      |
| 4      | 2      | 2      | 2      | 3      | 1      | 2      | 2      | 2      | 1      | 1      | 4      |
| 3      | 1      | 1      | 2      | 1      | 0      | 1      | 3      | 2      | 1      | 2      | 2      |
| 4      | 3      | 1      | 1      | 0      | 0      | 0      | 2      | 1      | 1      | 1      | 4      |
| 3.6    | 2.5    | 1.5    | 1.5    | 1.5    | 0.6    | 0.6    | 3.0    | 1.5    | 1.5    | 1.5    | 3.0    |

Frui loss in % per box in 4 harvests

| 2013   |        |        |        | 2014   |        |        |        | 2015   |        |        |        |
|--------|--------|--------|--------|--------|--------|--------|--------|--------|--------|--------|--------|
| H1     | H2     | H3     | H4     | H1     | H2     | H3     | H4     | H1     | H2     | H3     | H4     |
| 04.09. | 09.09. | 13.09. | 18.09. | 08.09. | 12.09. | 16.09. | 20.09. | 13.09. | 17.09. | 21.09. | 25.09. |
| 1      | 2      | 4      | 3      | 1      | 1      | 2      | 2      | 0      | 0      | 2      | 2      |
| 0      | 1      | 4      | 3      | 2      | 1      | 0      | 4      | 2      | 0      | 6      | 11     |
| 0      | 2      | 8      | 4      | 1      | 0      | 2      | 5      | 1      | 0      | 4      | 5      |
| 2      | 1      | 5      | 2      | 5      | 2      | 3      | 3      | 4      | 1      | 2      | 5      |
| 0.8    | 1.5    | 5.3    | 3.0    | 2.3    | 1.0    | 1.8    | 3.5    | 1.8    | 0.3    | 3.5    | 5.8    |

| 2016   |        |        |        | 2017   |        |        |        |
|--------|--------|--------|--------|--------|--------|--------|--------|
| H1     | H2     | H3     | H4     | H1     | H2     | H3     | H4     |
| 07.09. | 12.09. | 16.09. | 20.09. | 13.09. | 18.09. | 22.09. | 26.09. |
| 3      | 3      | 2      | 2      | 3      | 2      | 2      | 3      |
| 3      | 7      | 1      | 3      | 4      | 2      | 1      | 2      |
| 4      | 3      | 3      | 2      | 4      | 1      | 1      | 2      |
| 4      | 5      | 0      | 2      | 5      | 5      | 0      | 1      |
| 3.5    | 4.5    | 1.5    | 2.3    | 4.0    | 2.5    | 1.0    | 2.0    |

| 2007   |        |        |        | 2008   |        |        |        | 2009   |        |        |        |
|--------|--------|--------|--------|--------|--------|--------|--------|--------|--------|--------|--------|
| H1     | H2     | H3     | H4     | H1     | H2     | H3     | H4     | H1     | H2     | H3     | H4     |
| 15.09. | 19.09. | 24.09. | 29.09. | 29.08. | 03.09. | 08.09. | 13.09. | 02.09. | 07.09. | 12.09. | 16.09. |
| 4.0    | 3.3    | 8.6    | 11.1   | 3.6    | 1.9    | 3.8    | 9.8    | 3.7    | 1.9    | 0.0    | 3.3    |
| 1.7    | 5.6    | 10.9   | 12.5   | 1.9    | 3.4    | 5.5    | 7.4    | 7.5    | 1.9    | 1.8    | 11.1   |
| 1.8    | 9.1    | 6.9    | 9.7    | 1.6    | 1.6    | 5.4    | 7.4    | 3.5    | 3.6    | 5.6    | 9.8    |
| 1.9    | 3.8    | 5.0    | 14.8   | 1.9    | 3.6    | 5.6    | 3.8    | 1.8    | 1.7    | 6.8    | 6.9    |
| 2.4    | 5.4    | 7.9    | 12.0   | 2.2    | 2.6    | 5.1    | 7.1    | 4.1    | 2.3    | 3.5    | 7.8    |
| a      | b      | b      | c      | a      | a      | b      | b      | ab     | a      | ab     | b      |

| 2010   |        |        |        | 2011   |        |        |        | 2012   |        |        |        |
|--------|--------|--------|--------|--------|--------|--------|--------|--------|--------|--------|--------|
| H1     | H2     | H3     | H4     | H1     | H2     | H3     | H4     | H1     | H2     | H3     | H4     |
| 03.09. | 07.09. | 11.09. | 16.09. | 12.09. | 17.09. | 21.09. | 26.09. | 11.09. | 15.09. | 20.09. | 24.09. |
| 7.0    | 5.4    | 1.7    | 1.9    | 3.8    | 3.4    | 0.0    | 9.3    | 1.8    | 3.9    | 1.9    | 3.7    |
| 6.8    | 3.4    | 3.6    | 3.4    | 6.0    | 1.6    | 3.4    | 3.7    | 3.4    | 1.8    | 1.9    | 6.6    |
| 4.9    | 1.7    | 1.9    | 3.8    | 1.7    | 0.0    | 1.8    | 5.4    | 3.6    | 1.8    | 3.4    | 3.1    |
| 7.1    | 5.6    | 1.8    | 1.8    | 0.0    | 0.0    | 0.0    | 3.5    | 1.8    | 1.7    | 1.8    | 6.9    |

|     |     |     |     |     |     |     |     |     |     |     |     |
|-----|-----|-----|-----|-----|-----|-----|-----|-----|-----|-----|-----|
| 6.5 | 4.0 | 2.3 | 2.7 | 2.9 | 1.3 | 1.3 | 5.5 | 2.7 | 2.3 | 2.3 | 5.1 |
| b   | a   | a   | a   | ab  | a   | a   | b   | a   | a   | a   | b   |

| 2013   |        |        |        | 2014   |        |        |        | 2015   |        |        |        |
|--------|--------|--------|--------|--------|--------|--------|--------|--------|--------|--------|--------|
| H1     | H2     | H3     | H4     | H1     | H2     | H3     | H4     | H1     | H2     | H3     | H4     |
| 04.09. | 09.09. | 13.09. | 18.09. | 08.09. | 12.09. | 16.09. | 20.09. | 13.09. | 17.09. | 21.09. | 25.09. |
| 1.9    | 3.5    | 7.7    | 5.2    | 1.9    | 1.8    | 3.6    | 3.6    | 0.0    | 0.0    | 3.3    | 3.5    |
| 0.0    | 1.7    | 8.0    | 4.9    | 3.7    | 1.8    | 0.0    | 7.5    | 3.3    | 0.0    | 10.3   | 18.3   |
| 0.0    | 3.3    | 13.8   | 7.4    | 1.8    | 0.0    | 3.1    | 8.2    | 1.7    | 0.0    | 7.4    | 8.9    |
| 3.5    | 1.8    | 8.6    | 3.5    | 8.9    | 3.4    | 5.1    | 5.2    | 6.6    | 1.7    | 3.4    | 9.1    |
| 1.3    | 2.6    | 9.5    | 5.3    | 4.1    | 1.8    | 2.9    | 6.1    | 2.9    | 0.4    | 6.1    | 10.0   |

| 2016   |        |        |        | 2017   |        |        |        |
|--------|--------|--------|--------|--------|--------|--------|--------|
| H1     | H2     | H3     | H4     | H1     | H2     | H3     | H4     |
| 07.09. | 12.09. | 16.09. | 20.09. | 13.09. | 18.09. | 22.09. | 26.09. |
| 5.0    | 4.8    | 3.6    | 3.5    | 5.6    | 3.2    | 3.9    | 5.5    |
| 5.3    | 13.0   | 1.7    | 4.8    | 6.6    | 3.3    | 1.7    | 3.4    |
| 8.0    | 4.9    | 5.2    | 3.7    | 6.9    | 1.8    | 1.9    | 3.5    |
| 6.9    | 9.3    | 0.0    | 3.6    | 8.8    | 8.6    | 0.0    | 1.8    |
| 6.3    | 8.0    | 2.6    | 3.9    | 6.9    | 4.2    | 1.9    | 3.5    |

| 2007  | 2008  | 2009  | 2010  | 2011  |
|-------|-------|-------|-------|-------|
| 4     | 3.571 | 3.704 | 7.018 | 3.846 |
| 1.724 | 1.923 | 7.547 | 6.78  | 4     |
| 1.786 | 1.639 | 3.509 | 4.918 | 1.724 |
| 1.923 | 1.852 | 1.754 | 7.143 | 0     |
| 3.279 | 1.852 | 1.852 | 5.357 | 3.448 |
| 5.556 | 3.448 | 1.923 | 3.448 | 1.639 |
| 9.091 | 1.613 | 3.636 | 1.667 | 0     |
| 3.846 | 3.571 | 1.724 | 5.556 | 0     |
| 8.621 | 3.846 | 0     | 1.724 | 0     |
| 10.91 | 5.455 | 1.818 | 3.636 | 3.448 |
| 6.897 | 5.357 | 5.556 | 1.923 | 1.818 |
| 5     | 5.556 | 6.78  | 1.754 | 0     |
| 11.11 | 9.804 | 3.279 | 1.852 | 9.259 |
| 12.5  | 7.407 | 11.11 | 3.448 | 0     |
| 9.677 | 7.407 | 9.804 | 3.774 | 3.571 |
| 14.81 | 3.846 | 6.897 | 1.786 | 1.754 |

| 2012  | 2013  | 2014  | 2015  | 2016  | 2017  |
|-------|-------|-------|-------|-------|-------|
| 1.786 | 1.852 | 1.852 | 0     | 3.333 | 5.556 |
| 3.448 | 0     | 3.704 | 3.279 | 3.509 | 3.279 |
| 3.636 | 0     | 1.754 | 1.695 | 8     | 6.897 |
| 1.754 | 3.509 | 8.929 | 6.557 | 8.621 | 12.28 |
| 3.922 | 3.509 | 1.818 | 0     | 4.839 | 3.226 |
| 1.754 | 1.695 | 1.818 | 0     | 12.96 | 3.333 |
| 1.786 | 3.279 | 0     | 0     | 4.918 | 1.786 |
| 1.724 | 1.786 | 3.448 | 1.667 | 9.259 | 8.621 |

|       |       |       |       |       |       |
|-------|-------|-------|-------|-------|-------|
| 1.923 | 7.692 | 3.571 | 3.333 | 3.571 | 3.922 |
| 1.852 | 8     | 0     | 10.34 | 1.724 | 1.724 |
| 3.448 | 13.79 | 3.125 | 7.407 | 6.897 | 1.852 |
| 1.786 | 8.621 | 5.085 | 3.448 | 0     | 0     |
| 1.852 | 5.172 | 3.636 | 3.509 | 1.754 | 7.273 |
| 6.557 | 4.918 | 7.547 | 18.33 | 6.452 | 3.448 |
| 3.077 | 7.407 | 8.197 | 8.929 | 3.704 | 3.509 |
| 6.897 | 3.509 | 5.172 | 9.091 | 3.571 | 0     |

| 2007   |        |        |        | 2008   |        |        |        | 2009   |        |        |        |
|--------|--------|--------|--------|--------|--------|--------|--------|--------|--------|--------|--------|
| H1     | H2     | H3     | H4     | H1     | H2     | H3     | H4     | H1     | H2     | H3     | H4     |
| 15.09. | 19.09. | 24.09. | 29.09. | 29.08. | 03.09. | 08.09. | 13.09. | 02.09. | 07.09. | 12.09. | 16.09. |
| 3.3    | 3.5    | 4.1    | 4.5    | 4.1    | 4.0    | 4.2    | 4.5    | 3.8    | 3.0    | 3.3    | 3.3    |
| 3.8    | 3.6    | 4.4    | 4.6    | 4.2    | 3.9    | 3.8    | 4.6    | 3.6    | 3.1    | 3.1    | 3.3    |
| 3.6    | 3.8    | 4.3    | 4.5    | 4.4    | 3.8    | 3.9    | 4.4    | 3.7    | 3.2    | 3.2    | 3.5    |
| 3.5    | 3.5    | 4.3    | 4.5    | 4.6    | 4.2    | 3.9    | 4.7    | 3.6    | 3.1    | 3.2    | 3.4    |
| 3.6    | 3.6    | 4.3    | 4.5    | 4.3    | 4.0    | 4.0    | 4.6    | 3.7    | 3.1    | 3.2    | 3.4    |
| 2010   |        |        |        | 2011   |        |        |        | 2012   |        |        |        |
| H1     | H2     | H3     | H4     | H1     | H2     | H3     | H4     | H1     | H2     | H3     | H4     |
| 03.09. | 07.09. | 11.09. | 16.09. | 12.09. | 17.09. | 21.09. | 26.09. | 11.09. | 15.09. | 20.09. | 24.09. |
| 5.8    | 5.2    | 4.5    | 4.4    | 4.3    | 3.9    | 4.0    | 4.4    | 4.6    | 4.4    | 3.8    | 4.2    |
| 5.6    | 5.1    | 4.4    | 4.1    | 4.4    | 3.6    | 3.8    | 4.6    | 4.6    | 4.1    | 4.0    | 4.4    |
| 5.5    | 5.2    | 4.2    | 4.2    | 4.6    | 3.8    | 3.8    | 4.7    | 4.5    | 4.0    | 4.1    | 4.1    |
| 5.7    | 5.3    | 4.4    | 4.2    | 4.5    | 3.6    | 3.7    | 4.6    | 4.7    | 4.1    | 3.9    | 4.5    |
| 5.7    | 5.2    | 4.4    | 4.2    | 4.5    | 3.7    | 3.8    | 4.6    | 4.6    | 4.2    | 4.0    | 4.3    |
| 2013   |        |        |        | 2014   |        |        |        | 2015   |        |        |        |
| H1     | H2     | H3     | H4     | H1     | H2     | H3     | H4     | H1     | H2     | H3     | H4     |
| 04.09. | 09.09. | 13.09. | 18.09. | 08.09. | 12.09. | 16.09. | 20.09. | 13.09. | 17.09. | 21.09. | 25.09. |
| 4.1    | 4.5    | 4.5    | 4.4    | 5.1    | 4.4    | 4.0    | 4.8    | 4.8    | 4.4    | 4.5    | 5.1    |
| 4.2    | 4.5    | 4.6    | 4.6    | 4.9    | 4.2    | 4.1    | 4.9    | 4.6    | 4.3    | 4.4    | 5.0    |
| 4.4    | 4.4    | 4.4    | 4.8    | 5.0    | 4.6    | 3.9    | 5.1    | 4.9    | 4.6    | 4.4    | 4.9    |
| 4.6    | 4.6    | 4.7    | 4.8    | 4.8    | 4.5    | 4.2    | 4.9    | 5.1    | 4.4    | 4.2    | 4.8    |
| 4.3    | 4.5    | 4.6    | 4.7    | 5.0    | 4.4    | 4.1    | 4.9    | 4.9    | 4.4    | 4.4    | 5.0    |
| 2016   |        |        |        | 2017   |        |        |        |        |        |        |        |
| H1     | H2     | H3     | H4     | H1     | H2     | H3     | H4     |        |        |        |        |
| 07.09. | 12.09. | 16.09. | 20.09. | 13.09. | 18.09. | 22.09. | 26.09. |        |        |        |        |
| 4.6    | 3.8    | 4.0    | 3.8    | 4.4    | 4.0    | 3.1    | 3.9    |        |        |        |        |
| 4.4    | 4.1    | 3.6    | 3.9    | 4.2    | 3.8    | 3.4    | 4.3    |        |        |        |        |
| 4.5    | 4.0    | 3.8    | 3.8    | 4.3    | 3.8    | 3.4    | 4.4    |        |        |        |        |
| 4.4    | 4.1    | 3.9    | 3.9    | 4.8    | 3.6    | 3.3    | 4.4    |        |        |        |        |
| 4.5    | 4.0    | 3.8    | 3.9    | 4.4    | 3.8    | 3.3    | 4.3    |        |        |        |        |

|      |    |     |      |    |     |      |    |     |
|------|----|-----|------|----|-----|------|----|-----|
| 2007 | H1 | 3.3 | 2009 | H1 | 3.8 | 2011 | H1 | 4.3 |
| 2007 | H1 | 3.8 | 2009 | H1 | 3.6 | 2011 | H1 | 4.4 |
| 2007 | H1 | 3.6 | 2009 | H1 | 3.7 | 2011 | H1 | 4.6 |
| 2007 | H1 | 3.5 | 2009 | H1 | 3.6 | 2011 | H1 | 4.5 |
| 2007 | H2 | 3.5 | 2009 | H2 | 3.0 | 2011 | H2 | 3.9 |
| 2007 | H2 | 3.6 | 2009 | H2 | 3.1 | 2011 | H2 | 3.6 |
| 2007 | H2 | 3.8 | 2009 | H2 | 3.2 | 2011 | H2 | 3.8 |
| 2007 | H2 | 3.5 | 2009 | H2 | 3.1 | 2011 | H2 | 3.6 |
| 2007 | H3 | 4.1 | 2009 | H3 | 3.3 | 2011 | H3 | 4.0 |
| 2007 | H3 | 4.4 | 2009 | H3 | 3.1 | 2011 | H3 | 3.8 |
| 2007 | H3 | 4.3 | 2009 | H3 | 3.2 | 2011 | H3 | 3.8 |
| 2007 | H3 | 4.3 | 2009 | H3 | 3.2 | 2011 | H3 | 3.7 |
| 2007 | H4 | 4.5 | 2009 | H4 | 3.3 | 2011 | H4 | 4.4 |

|      |    |     |
|------|----|-----|
| 2007 | H4 | 4.6 |
| 2007 | H4 | 4.5 |
| 2007 | H4 | 4.5 |
| 2008 | H1 | 4.1 |
| 2008 | H1 | 4.2 |
| 2008 | H1 | 4.4 |
| 2008 | H1 | 4.6 |
| 2008 | H2 | 4.0 |
| 2008 | H2 | 3.9 |
| 2008 | H2 | 3.8 |
| 2008 | H2 | 4.2 |
| 2008 | H3 | 4.2 |
| 2008 | H3 | 3.8 |
| 2008 | H3 | 3.9 |
| 2008 | H3 | 3.9 |
| 2008 | H4 | 4.5 |
| 2008 | H4 | 4.6 |
| 2008 | H4 | 4.4 |
| 2008 | H4 | 4.7 |

|      |    |     |
|------|----|-----|
| 2009 | H4 | 3.3 |
| 2009 | H4 | 3.5 |
| 2009 | H4 | 3.4 |
| 2010 | H1 | 5.8 |
| 2010 | H1 | 5.6 |
| 2010 | H1 | 5.5 |
| 2010 | H1 | 5.7 |
| 2010 | H2 | 5.2 |
| 2010 | H2 | 5.1 |
| 2010 | H2 | 5.2 |
| 2010 | H2 | 5.3 |
| 2010 | H3 | 4.5 |
| 2010 | H3 | 4.4 |
| 2010 | H3 | 4.2 |
| 2010 | H3 | 4.4 |
| 2010 | H4 | 4.4 |
| 2010 | H4 | 4.1 |
| 2010 | H4 | 4.2 |
| 2010 | H4 | 4.2 |

|      |    |     |
|------|----|-----|
| 2011 | H4 | 4.6 |
| 2011 | H4 | 4.7 |
| 2011 | H4 | 4.6 |
| 2012 | H1 | 4.6 |
| 2012 | H1 | 4.6 |
| 2012 | H1 | 4.5 |
| 2012 | H1 | 4.7 |
| 2012 | H2 | 4.4 |
| 2012 | H2 | 4.1 |
| 2012 | H2 | 4.0 |
| 2012 | H2 | 4.1 |
| 2012 | H3 | 3.8 |
| 2012 | H3 | 4.0 |
| 2012 | H3 | 4.1 |
| 2012 | H3 | 3.9 |
| 2012 | H4 | 4.2 |
| 2012 | H4 | 4.4 |
| 2012 | H4 | 4.1 |
| 2012 | H4 | 4.5 |

|      |    |     |
|------|----|-----|
| 2013 | H1 | 4.1 |
| 2013 | H1 | 4.2 |
| 2013 | H1 | 4.4 |
| 2013 | H1 | 4.6 |
| 2013 | H2 | 4.5 |
| 2013 | H2 | 4.5 |
| 2013 | H2 | 4.4 |
| 2013 | H2 | 4.6 |
| 2013 | H3 | 4.5 |
| 2013 | H3 | 4.6 |
| 2013 | H3 | 4.4 |
| 2013 | H3 | 4.7 |
| 2013 | H4 | 4.4 |
| 2013 | H4 | 4.6 |
| 2013 | H4 | 4.8 |
| 2013 | H4 | 4.8 |
| 2014 | H1 | 5.1 |
| 2014 | H1 | 4.9 |
| 2014 | H1 | 5.0 |
| 2014 | H1 | 4.8 |
| 2014 | H2 | 4.4 |
| 2014 | H2 | 4.2 |
| 2014 | H2 | 4.6 |
| 2014 | H2 | 4.5 |
| 2014 | H3 | 4.0 |
| 2014 | H3 | 4.1 |
| 2014 | H3 | 3.9 |
| 2014 | H3 | 4.2 |
| 2014 | H4 | 4.8 |
| 2014 | H4 | 4.9 |

|      |    |     |
|------|----|-----|
| 2015 | H1 | 4.8 |
| 2015 | H1 | 4.6 |
| 2015 | H1 | 4.9 |
| 2015 | H1 | 5.1 |
| 2015 | H2 | 4.4 |
| 2015 | H2 | 4.3 |
| 2015 | H2 | 4.6 |
| 2015 | H2 | 4.4 |
| 2015 | H3 | 4.5 |
| 2015 | H3 | 4.4 |
| 2015 | H3 | 4.4 |
| 2015 | H3 | 4.2 |
| 2015 | H4 | 5.1 |
| 2015 | H4 | 5.0 |
| 2015 | H4 | 4.9 |
| 2015 | H4 | 4.8 |
| 2016 | H1 | 4.6 |
| 2016 | H1 | 4.4 |
| 2016 | H1 | 4.5 |
| 2016 | H1 | 4.4 |
| 2016 | H2 | 3.8 |
| 2016 | H2 | 4.1 |
| 2016 | H2 | 4.0 |
| 2016 | H2 | 4.1 |
| 2016 | H3 | 3.2 |
| 2016 | H3 | 3.1 |
| 2016 | H3 | 3.3 |
| 2016 | H3 | 3.2 |
| 2016 | H4 | 3.8 |
| 2016 | H4 | 3.9 |

|      |    |     |
|------|----|-----|
| 2017 | H1 | 4.4 |
| 2017 | H1 | 4.2 |
| 2017 | H1 | 4.3 |
| 2017 | H1 | 4.8 |
| 2017 | H2 | 4.0 |
| 2017 | H2 | 3.8 |
| 2017 | H2 | 3.8 |
| 2017 | H2 | 3.6 |
| 2017 | H3 | 3.1 |
| 2017 | H3 | 3.4 |
| 2017 | H3 | 3.4 |
| 2017 | H3 | 3.3 |
| 2017 | H4 | 3.9 |
| 2017 | H4 | 4.3 |
| 2017 | H4 | 4.4 |
| 2017 | H4 | 4.4 |

|      |    |     |
|------|----|-----|
| 2014 | H4 | 5.1 |
| 2014 | H4 | 4.9 |

|      |    |     |
|------|----|-----|
| 2016 | H4 | 3.8 |
| 2016 | H4 | 3.9 |

2007

| Harvest1 |       |     | Harvest2 |       |     | Harvest3 |       |     | Harvest4 |       |     |
|----------|-------|-----|----------|-------|-----|----------|-------|-----|----------|-------|-----|
| B        | A     | %   | B        | A     | %   | B        | A     | %   | B        | A     | %   |
| 186.9    | 181.4 | 2.9 | 185.5    | 179.5 | 3.2 | 205.1    | 197.1 | 3.9 | 217.3    | 209.8 | 3.5 |
| 205.4    | 197.9 | 3.7 | 195.9    | 188.8 | 3.6 | 186.4    | 178.5 | 4.2 | 201.4    | 192.5 | 4.4 |
| 209.5    | 204.0 | 2.6 | 188.0    | 182.2 | 3.1 | 199.2    | 190.8 | 4.2 | 207.6    | 196.4 | 5.4 |
| 214.5    | 208.0 | 3.0 | 186.9    | 180.4 | 3.5 | 205.1    | 197.5 | 3.7 | 199.4    | 191.7 | 3.9 |
| 205.3    | 199.8 | 2.7 | 205.4    | 198.3 | 3.5 | 214.3    | 205.3 | 4.2 | 187.9    | 178.3 | 5.1 |
| 188.4    | 182.9 | 2.9 | 209.5    | 202.5 | 3.3 | 209.1    | 200.2 | 4.3 | 205.2    | 195.9 | 4.5 |
| 189.1    | 180.3 | 4.7 | 214.5    | 206.3 | 3.8 | 189.5    | 181.8 | 4.1 | 206.8    | 198.6 | 4.0 |
| 204.8    | 197.3 | 3.7 | 205.3    | 197.6 | 3.8 | 179.6    | 172.3 | 4.1 | 228.5    | 216.3 | 5.3 |
| 209.5    | 202.0 | 3.6 | 188.4    | 181.2 | 3.8 | 188.5    | 181.1 | 3.9 | 179.5    | 170.0 | 5.3 |
| 188.0    | 181.5 | 3.5 | 189.1    | 182.6 | 3.4 | 201.6    | 192.7 | 4.4 | 182.4    | 175.8 | 3.6 |
| 189.0    | 181.5 | 4.0 | 204.8    | 198.3 | 3.2 | 218.0    | 207.7 | 4.7 | 196.9    | 188.5 | 4.3 |
| 206.0    | 198.0 | 3.9 | 209.5    | 200.8 | 4.2 | 186.2    | 179.8 | 3.4 | 188.4    | 179.2 | 4.9 |
| 198.0    | 190.0 | 4.0 | 182.2    | 174.3 | 4.3 | 188.5    | 179.7 | 4.7 | 197.5    | 189.3 | 4.2 |
| 188.0    | 180.0 | 4.3 | 188.6    | 182.8 | 3.1 | 206.3    | 196.9 | 4.6 | 209.3    | 198.6 | 5.1 |
| 216.0    | 207.5 | 3.9 | 194.1    | 189.6 | 2.3 | 188.9    | 180.5 | 4.4 | 211.5    | 203.1 | 4.0 |
| 201.0    | 194.5 | 3.2 | 199.2    | 192.4 | 3.4 | 217.6    | 206.9 | 4.9 | 195.3    | 186.9 | 4.3 |
| 186.0    | 179.5 | 3.5 | 197.0    | 188.5 | 4.3 | 209.2    | 200.0 | 4.4 | 187.4    | 179.6 | 4.2 |
| 188.0    | 180.5 | 4.0 | 205.0    | 199.5 | 2.7 | 178.1    | 170.1 | 4.5 | 195.2    | 186.6 | 4.4 |
| 213.0    | 204.5 | 4.0 | 183.7    | 176.4 | 4.0 | 198.0    | 190.5 | 3.8 | 199.5    | 188.4 | 5.6 |
| 212.6    | 205.1 | 3.5 | 213.0    | 203.9 | 4.3 | 204.5    | 196.0 | 4.2 | 208.0    | 196.8 | 5.4 |
| 173.1    | 164.3 | 5.1 | 232.6    | 224.5 | 3.5 | 211.0    | 202.9 | 3.8 | 212.5    | 204.1 | 4.0 |
| 193.7    | 188.2 | 2.8 | 199.0    | 194.3 | 2.4 | 217.0    | 206.2 | 5.0 | 196.5    | 187.2 | 4.7 |
| 181.4    | 175.9 | 3.0 | 187.5    | 181.0 | 3.5 | 188.0    | 180.4 | 4.0 | 217.3    | 203.6 | 6.3 |
| 185.5    | 180.0 | 3.0 | 204.5    | 196.4 | 4.0 | 193.4    | 187.1 | 3.3 | 219.5    | 210.7 | 4.0 |
| 195.9    | 188.4 | 3.8 | 198.4    | 189.5 | 4.5 | 188.0    | 180.5 | 4.0 | 196.3    | 186.9 | 4.8 |
| 190.0    | 182.0 | 4.2 | 199.1    | 189.6 | 4.8 | 189.5    | 180.0 | 5.0 | 190.0    | 181.5 | 4.5 |
| 188.9    | 182.4 | 3.4 | 206.2    | 199.6 | 3.2 | 195.6    | 187.3 | 4.2 | 188.9    | 180.7 | 4.3 |
| 201.4    | 194.9 | 3.2 | 207.1    | 200.0 | 3.4 | 197.9    | 188.5 | 4.7 | 201.4    | 191.5 | 4.9 |
| 195.6    | 188.1 | 3.8 | 211.2    | 200.8 | 4.9 | 207.0    | 197.9 | 4.4 | 195.6    | 187.9 | 3.9 |
| 189.2    | 182.7 | 3.4 | 204.1    | 196.4 | 3.8 | 200.0    | 191.5 | 4.3 | 189.2    | 182.0 | 3.8 |
| 245.2    | 235.9 | 3.8 | 188.7    | 182.7 | 3.2 | 195.4    | 186.0 | 4.8 | 216.0    | 206.9 | 4.2 |
| 187.0    | 181.1 | 3.2 | 179.3    | 172.5 | 3.8 | 204.5    | 195.3 | 4.5 | 215.6    | 206.2 | 4.4 |
| 193.9    | 186.3 | 3.9 | 198.2    | 192.3 | 3.0 | 207.2    | 197.3 | 4.8 | 186.0    | 176.4 | 5.2 |
| 185.8    | 180.8 | 2.7 | 189.1    | 181.6 | 4.0 | 188.6    | 181.1 | 4.0 | 207.1    | 196.1 | 5.3 |
| 183.7    | 176.5 | 3.9 | 193.2    | 186.4 | 3.5 | 194.1    | 186.1 | 4.1 | 188.0    | 180.5 | 4.0 |
| 213.0    | 204.5 | 4.0 | 175.9    | 169.3 | 3.8 | 208.4    | 200.5 | 3.8 | 189.5    | 181.0 | 4.5 |
| 212.6    | 205.8 | 3.2 | 195.4    | 189.3 | 3.1 | 211.5    | 202.6 | 4.2 | 195.6    | 187.3 | 4.2 |
| 173.1    | 167.9 | 3.0 | 188.5    | 182.0 | 3.4 | 206.1    | 196.6 | 4.6 | 197.9    | 188.5 | 4.7 |
| 193.7    | 186.7 | 3.6 | 195.4    | 186.7 | 4.5 | 188.4    | 180.2 | 4.4 | 207.0    | 197.9 | 4.4 |
| 181.4    | 175.3 | 3.4 | 189.1    | 183.9 | 2.7 | 195.5    | 188.1 | 3.8 | 200.0    | 191.5 | 4.3 |

2008

| Harvest1 |       |     | Harvest2 |       |     | Harvest3 |       |     | Harvest4 |       |     |
|----------|-------|-----|----------|-------|-----|----------|-------|-----|----------|-------|-----|
| B        | A     | %   | B        | A     | %   | B        | A     | %   | B        | A     | %   |
| 210.0    | 201.8 | 3.9 | 158.0    | 152.6 | 3.4 | 205.1    | 197.1 | 3.9 | 187.5    | 179.5 | 4.3 |
| 206.0    | 197.8 | 4.0 | 187.0    | 180.5 | 3.5 | 186.4    | 178.5 | 4.2 | 192.4    | 183.1 | 4.8 |
| 200.0    | 190.6 | 4.7 | 210.0    | 201.3 | 4.1 | 199.2    | 189.8 | 4.7 | 207.1    | 198.8 | 4.0 |
| 206.2    | 197.7 | 4.1 | 203.0    | 195.4 | 3.7 | 205.1    | 197.5 | 3.7 | 214.6    | 206.3 | 3.9 |
| 186.9    | 176.4 | 5.6 | 188.0    | 178.7 | 4.9 | 214.3    | 205.3 | 4.2 | 225.5    | 217.2 | 3.7 |
| 185.3    | 178.8 | 3.5 | 176.0    | 166.6 | 5.3 | 209.1    | 200.2 | 4.3 | 210.4    | 198.7 | 5.6 |
| 200.5    | 194.0 | 3.2 | 177.0    | 170.7 | 3.6 | 189.5    | 180.8 | 4.6 | 198.4    | 190.7 | 3.9 |
| 194.2    | 186.7 | 3.9 | 190.0    | 183.7 | 3.3 | 179.6    | 172.3 | 4.1 | 186.3    | 178.9 | 4.0 |
| 219.3    | 208.9 | 4.7 | 206.0    | 199.1 | 3.3 | 188.5    | 181.1 | 3.9 | 193.1    | 180.7 | 6.4 |
| 276.2    | 266.7 | 3.4 | 204.0    | 194.0 | 4.9 | 201.6    | 192.7 | 4.4 | 192.5    | 184.1 | 4.4 |
| 190.0    | 181.8 | 4.3 | 185.0    | 178.3 | 3.6 | 218.0    | 207.7 | 4.7 | 184.5    | 178.0 | 3.5 |
| 198.0    | 189.8 | 4.1 | 192.0    | 185.8 | 3.2 | 186.2    | 179.8 | 3.4 | 195.4    | 184.8 | 5.4 |
| 187.0    | 178.4 | 4.6 | 179.0    | 172.3 | 3.7 | 188.5    | 179.7 | 4.7 | 197.8    | 185.7 | 6.1 |
| 210.0    | 199.6 | 5.0 | 201.0    | 192.8 | 4.1 | 206.3    | 199.9 | 3.1 | 210.0    | 199.4 | 5.0 |
| 203.0    | 194.6 | 4.1 | 200.0    | 191.6 | 4.2 | 188.9    | 180.5 | 4.4 | 206.0    | 198.4 | 3.7 |
| 188.0    | 180.5 | 4.0 | 194.0    | 186.4 | 3.9 | 217.6    | 206.9 | 4.9 | 229.0    | 222.4 | 2.9 |
| 225.0    | 214.5 | 4.7 | 187.0    | 180.5 | 3.5 | 209.2    | 200.0 | 4.4 | 206.2    | 200.4 | 2.8 |
| 188.0    | 181.5 | 3.5 | 214.0    | 204.5 | 4.4 | 178.1    | 172.1 | 3.4 | 186.9    | 179.7 | 3.9 |
| 189.0    | 181.5 | 4.0 | 167.0    | 162.0 | 3.0 | 198.0    | 192.5 | 2.8 | 185.3    | 173.1 | 6.6 |
| 206.0    | 198.4 | 3.7 | 188.0    | 177.9 | 5.4 | 204.5    | 200.0 | 2.2 | 200.5    | 188.3 | 6.1 |
| 198.0    | 191.8 | 3.1 | 232.6    | 224.5 | 3.5 | 216.0    | 206.9 | 4.2 | 227.1    | 219.1 | 3.5 |
| 208.9    | 200.5 | 4.0 | 199.0    | 194.3 | 2.4 | 215.6    | 206.2 | 4.4 | 219.3    | 206.9 | 5.7 |
| 216.0    | 205.5 | 4.9 | 187.5    | 181.0 | 3.5 | 186.0    | 180.4 | 3.0 | 276.2    | 267.5 | 3.1 |
| 201.0    | 195.5 | 2.7 | 204.5    | 196.4 | 4.0 | 207.1    | 199.1 | 3.9 | 184.2    | 176.0 | 4.5 |
| 186.0    | 179.5 | 3.5 | 198.4    | 189.5 | 4.5 | 188.0    | 180.5 | 4.0 | 179.3    | 170.1 | 5.1 |
| 188.0    | 178.0 | 5.3 | 199.1    | 189.6 | 4.8 | 189.5    | 184.0 | 2.9 | 199.9    | 194.5 | 2.7 |
| 182.0    | 173.6 | 4.6 | 206.2    | 199.6 | 3.2 | 195.6    | 187.3 | 4.2 | 184.1    | 177.7 | 3.5 |
| 201.0    | 191.0 | 5.0 | 207.1    | 200.0 | 3.4 | 197.9    | 190.5 | 3.7 | 193.4    | 185.3 | 4.2 |
| 194.0    | 184.5 | 4.9 | 211.2    | 200.8 | 4.9 | 207.0    | 197.9 | 4.4 | 179.8    | 168.7 | 6.2 |
| 192.0    | 180.5 | 6.0 | 204.1    | 196.4 | 3.8 | 200.0    | 191.5 | 4.3 | 200.2    | 189.1 | 5.5 |
| 195.0    | 187.3 | 3.9 | 188.7    | 180.7 | 4.2 | 195.4    | 188.0 | 3.8 | 206.0    | 197.0 | 4.4 |
| 208.0    | 197.9 | 4.9 | 179.3    | 172.5 | 3.8 | 204.5    | 198.3 | 3.0 | 185.0    | 176.7 | 4.5 |
| 203.0    | 194.7 | 4.1 | 198.2    | 189.3 | 4.5 | 207.2    | 197.3 | 4.8 | 180.0    | 171.7 | 4.6 |
| 183.0    | 172.9 | 5.5 | 189.1    | 178.6 | 5.6 | 188.6    | 181.1 | 4.0 | 238.0    | 228.0 | 4.2 |
| 186.0    | 175.4 | 5.7 | 193.2    | 186.4 | 3.5 | 194.1    | 186.1 | 4.1 | 193.0    | 184.2 | 4.6 |
| 210.0    | 199.5 | 5.0 | 175.9    | 167.3 | 4.9 | 208.4    | 200.5 | 3.8 | 225.0    | 212.5 | 5.6 |
| 217.0    | 205.9 | 5.1 | 195.4    | 186.3 | 4.7 | 211.5    | 202.6 | 4.2 | 205.0    | 195.3 | 4.7 |
| 201.0    | 193.7 | 3.6 | 188.5    | 182.0 | 3.4 | 206.1    | 199.6 | 3.2 | 194.0    | 184.8 | 4.7 |
| 195.0    | 186.3 | 4.5 | 195.4    | 186.7 | 4.5 | 188.4    | 181.2 | 3.8 | 173.0    | 163.7 | 5.4 |
| 190.0    | 183.9 | 3.2 | 189.1    | 183.9 | 2.7 | 195.5    | 188.1 | 3.8 | 195.0    | 186.2 | 4.5 |



| ### | ZBIÓ | %   | Point |   |
|-----|------|-----|-------|---|
|     | R    |     |       |   |
|     | H1   | 3.6 | a     | 3 |
|     | H2   | 3.6 | a     | 3 |
|     | H3   | 4.3 | b     | 2 |
|     | H4   | 4.5 | c     | 1 |

| ### | ZBIÓ | %   |   |   |
|-----|------|-----|---|---|
|     | R    |     |   |   |
|     | H1   | 4.3 | b | 1 |
|     | H2   | 4.0 | a | 2 |
|     | H3   | 4.0 | a | 2 |
|     | H4   | 4.6 | b | 1 |

| ### | ZBIÓ | %   |   |   |
|-----|------|-----|---|---|
|     | R    |     |   |   |
|     | H1   | 3.7 | c | 1 |
|     | H2   | 3.1 | a | 3 |
|     | H3   | 3.2 | a | 3 |
|     | H4   | 3.4 | b | 2 |

| ### | ZBIÓ | %   |   |   |
|-----|------|-----|---|---|
|     | R    |     |   |   |
|     | H1   | 5.7 | c | 1 |
|     | H2   | 5.2 | b | 2 |
|     | H3   | 4.4 | a | 3 |
|     | H4   | 4.2 | a | 3 |

| ### | ZBIÓ | %   |   |   |
|-----|------|-----|---|---|
|     | R    |     |   |   |
|     | H1   | 4.5 | b | 1 |
|     | H2   | 3.7 | a | 2 |
|     | H3   | 3.8 | a | 2 |
|     | H4   | 4.6 | b | 1 |

| 2012 | ZBIÓ | %   |    |     |
|------|------|-----|----|-----|
|      | R    |     |    |     |
|      | H1   | 4.6 | c  | 1   |
|      | H2   | 4.2 | ab | 2.5 |
|      | H3   | 4.0 | a  | 3   |
|      | H4   | 4.3 | b  | 2   |

| 2013 | ZBIÓ | %   |    |     |
|------|------|-----|----|-----|
|      | R    |     |    |     |
|      | H1   | 4.3 | a  | 2   |
|      | H2   | 4.5 | ab | 1.5 |
|      | H3   | 4.6 | ab | 1.5 |
|      | H4   | 4.7 | b  | 1   |

| 2014 | ZBIÓ | %   |   |   |
|------|------|-----|---|---|
|      | R    |     |   |   |
|      | H1   | 5.0 | c | 1 |
|      | H2   | 4.4 | b | 2 |
|      | H3   | 4.1 | a | 3 |
|      | H4   | 4.9 | c | 1 |

| 2015 | ZBIÓ | %   |   |   |
|------|------|-----|---|---|
|      | R    |     |   |   |
|      | H1   | 4.9 | b | 1 |
|      | H2   | 4.4 | a | 2 |
|      | H3   | 4.4 | a | 2 |
|      | H4   | 5.0 | b | 1 |

| 2016 | ZBIÓ | %   |   |   |
|------|------|-----|---|---|
|      | R    |     |   |   |
|      | H1   | 4.5 | c | 1 |
|      | H2   | 4.0 | b | 2 |
|      | H3   | 3.8 | a | 2 |
|      | H4   | 3.9 | b | 2 |

| 2017 | ZBIÓ | %   |   |   |
|------|------|-----|---|---|
|      | R    |     |   |   |
|      | H1   | 4.4 | c | 1 |
|      | H2   | 3.8 | b | 2 |
|      | H3   | 3.3 | a | 3 |
|      | H4   | 4.3 | c | 1 |
